# Supplementary material for: CRISPR-mediated genetic interaction profiling identifies RNA binding proteins controlling metazoan fitness
Source: eLife journal article supplement (doi:10.7554/elife.28129), 2017-07-18

Figure 5 – figure supplement 2

**A**

Splicing events regulated by *exc-7*; *mbi-1*

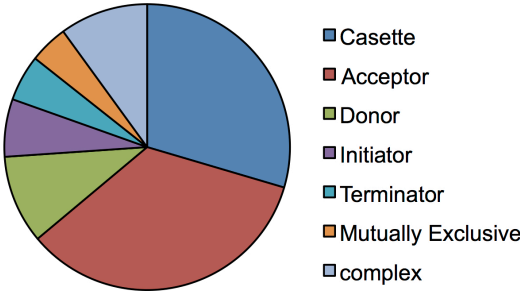

Total splicing events in *C. elegans*

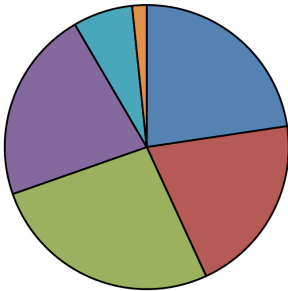

**B**

Exons skipped in *exc-7*; *mbi-1* mutants

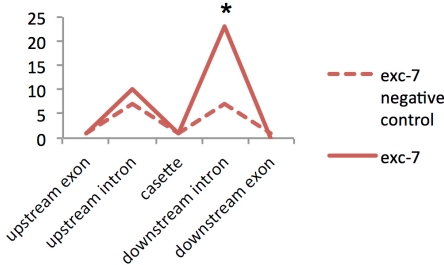

Exons included in *exc-7*; *mbi-1* mutants

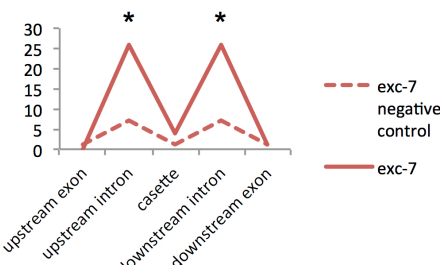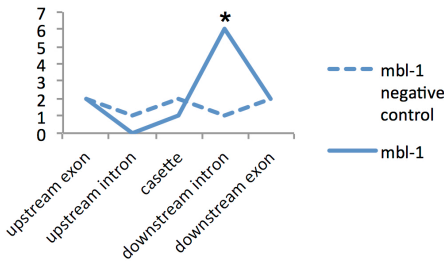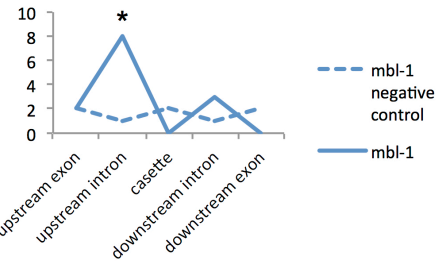

Supplement: supp [file elife-28129-supp-v1.zip]
