# Supplementary material for: CRISPR-mediated genetic interaction profiling identifies RNA binding proteins controlling metazoan fitness
Source: eLife journal article supplement (doi:10.7554/elife.28129), 2017-07-18
Supplement: supp [file elife-28129-supp-v1.zip]

Archive with 13 entries (13 files):
- elife_poa_e28129_Figure_2_figure_supplement_1.pdf
- elife_poa_e28129_Supplementary_File_3.xlsx
- elife_poa_e28129_Figure_6_figure_supplement_1.pdf
- elife_poa_e28129_Supplementary_File_6.xlsx
- elife_poa_e28129_Figure_3_figure_supplement_1.pdf
- elife_poa_e28129_Supplementary_File_5.xlsx
- elife_poa_e28129_Figure_5_figure_supplement_1.pdf
- elife_poa_e28129_Supplementary_File_1.xlsx
- elife_poa_e28129_Figure_5_figure_supplement_2.pdf
- elife_poa_e28129_Figure_3_figure_supplement_2.pdf
- elife_poa_e28129_Supplementary_File_4.xlsx
- elife_poa_e28129_Supplementary_Movie_1.mp4
- elife_poa_e28129_Supplementary_File_2.xlsx
