# Supplementary material for: CRISPR-mediated genetic interaction profiling identifies RNA binding proteins controlling metazoan fitness
Source: eLife journal article supplement (doi:10.7554/elife.28129), 2017-07-18
Supplement: supp [file elife-28129-supp-v1.zip › elife_poa_e28129_Figure_3_figure_supplement_1.pdf]

Figure 3 – figure supplement 1

**A**

$\frac{mec-8(e398)}{+}$  ;  $\frac{exc-7(rh242)}{exc-7(rh242)}$   $\longrightarrow$  0% viable double homozygotes

$\frac{mec-8(csb14)}{+}$  ;  $\frac{exc-7(csb19)}{exc-7(csb19)}$   $\longrightarrow$  0% viable double homozygotes

$\frac{mec-8(csb24)}{mec-8(csb24)}$  ;  $\frac{exc-7(csb19)}{+}$   $\longrightarrow$  0% viable double homozygotes
