# Supplementary material for: CRISPR-mediated genetic interaction profiling identifies RNA binding proteins controlling metazoan fitness
Source: eLife journal article supplement (doi:10.7554/elife.28129), 2017-07-18

Figure 3 – figure supplement 2

**A**

(1) Double mutant fitness<sub>expected</sub> = Fitness<sub>mutant 1</sub> x Fitness<sub>mutant 2</sub>

(2) Synthetic effect ( $\epsilon$ ) = Fitness<sub>observed</sub> - Fitness<sub>expected</sub>

**B**

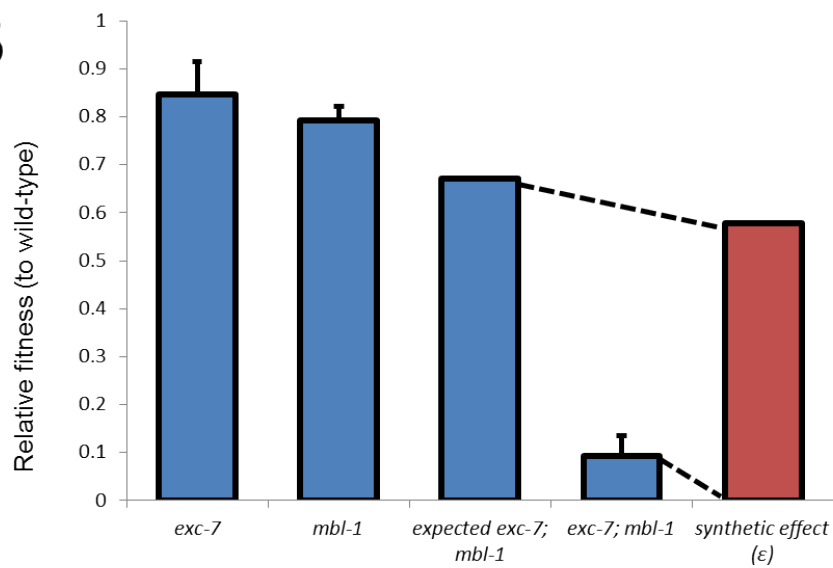

**C**

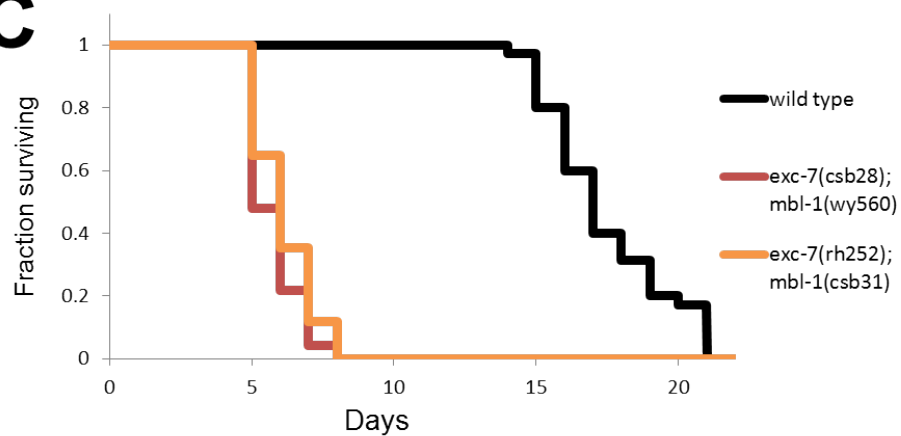

Supplement: supp [file elife-28129-supp-v1.zip › elife_poa_e28129_Figure_3_figure_supplement_2.pdf]
