# Supplementary material for: CRISPR-mediated genetic interaction profiling identifies RNA binding proteins controlling metazoan fitness
Source: eLife journal article supplement (doi:10.7554/elife.28129), 2017-07-18
Supplement: supp [file elife-28129-supp-v1.zip › elife_poa_e28129_Supplementary_File_1.xlsx]

## Sheet: Sheet1
Worm gene	Human Homolog		Bolds indicate >1 homolog
unc-75	CELF
fust-1	FUS
mec-8	RBPMS2
msi-1	MSI1
fox-1	RBFOX1/2
hrpf-1	HNRNPF
exc-7	ELAVL
mbl-1	MBNL1/2
asd-1	RBFOX1/2
sup-12	RBM24
tiar-3	TIAL1
Y57G11C.9	SRRM2
tdp-1	TDP-43
c25a1.4	HNRNPM
