# Supplementary material for: CRISPR-mediated genetic interaction profiling identifies RNA binding proteins controlling metazoan fitness
Source: eLife journal article supplement (doi:10.7554/elife.28129), 2017-07-18
Supplement: supp [file elife-28129-supp-v1.zip › elife_poa_e28129_Supplementary_File_2.xlsx]

## Sheet: single_mutant_competitions
Genotype	Trial1		Trial2		Trial3		Trial4		Trial5
	#mutant observed	#wt observed	#mutant observed	#wt observed	#mutant observed	#wt observed	#mutant observed	#wt observed	#mutant observed	#wt observed
unc-75	33	117	25	125
fust-1	64	86	70	80
mec-8	9	141	28	122	41	109	21	129	29	121
msi-1	89	61	36	114	72	78	75	75
fox-1	63	87	68	82
hrpf-1	60	90	66	84
exc-7	58	92	50	100	71	79
mbl-1	56	94	62	88
asd-1	50	100	71	79
tiar-3	73	77	74	76
sup-12	1	149	1	149
Y57G11C.9	64	86	64	86
tdp-1	75	75	85	65	71	79

## Sheet: double_mutant_competitions
				Trial1		Trial2 (if necessary)		Trial3 (if necessary)		Trial4 (if necessary)		Trial5 (if necessary)
genotype	p-value (Fisher's Exact)	#mutant expected	#wt expected	#mutant observed	#wt observed	#mutant expected	#wt expected	#mutant observed	#wt observed	#mutant expected	#wt expected	#mutant observed	#wt observed
unc-75; fust-1	0.00656608	48	252	10	140
unc-75; mec-8	0.875757	21	279	1	149	22	128
unc-75; msi-1	0.410039	51	249	20	130
unc-75; fox-1	0.891776	48	252	23	127
unc-75; hrpf-1	0.19418	48	252	16	134
unc-75; exc-7	1	45	255	22	128
unc-75; mbl-1	0.252824	48	252	17	133
unc-75; asd-1	0.512017	51	249	29	121
unc-75; tiar-3	0.0800246	57	243	18	132
unc-75; Y57G11C.9	0.0227161	51	249	56	94	39	111	14	136
unc-75; tdp-1	2.51002e-06	57	243	15	135	5	145	12	138
fust-1; mec-8	0.109744	45	255	31	119
fust-1; msi-1	0.411153	111	189	62	88
fust-1; fox-1	2.31655e-06	105	195	17	133	45	105	26	124
fust-1; hrpf-1	0.0127048	108	192	95	55	67	83	54	96	63	87	55	95
fust-1; exc-7	0.0620304	102	198	2	148	78	72
fust-1; mbl-1	2.85801e-05	102	198	32	118	20	130	39	111
fust-1; asd-1	0.168352	111	189	45	105	50	100
fust-1; tiar-3	1	123	177	62	88
fust-1; Y57G11C.9	0.755471	108	192	56	94
fust-1; tdp-1	1.32821e-08	129	171	26	124	35	115	42	108
mec-8; msi-1	0.0733631	45	255	13	137
mec-8; fox-1	0.00126504	42	258	1	149	12	138	16	134
mec-8; hrpf-1	0.000115352	42	258	3	147	11	139
mec-8; exc-7	1.69868e-08	42	258		150
mec-8; mbl-1	0.000996224	42	258	6	144
mec-8; asd-1	0.28332	45	255	29	123
mec-8; tiar-3	0.466338	51	249	44	106	42	108	29	121		150
mec-8; Y57G11C.9	0.00139136	45	255	7	143
mec-8; tdp-1	0.339947	51	249	20	130
msi-1; fox-1	0.736368	111	189	72	78	45	105
msi-1; hrpf-1	0.00770458	111	189	23	127	53	97	7	143	52	98	78	72
msi-1; exc-7	1.42895e-05	105	195	21	129	37	113	34	116
msi-1; mbl-1	0.931951	105	195	53	97	54	96
msi-1; asd-1	0.0577807	117	183	77	73	64	86
msi-1; tiar-3	0.0146377	129	171	7	143	92	58
msi-1; Y57G11C.9	0.550833	111	189	32	118	71	79
msi-1; tdp-1	0.0107211	132	168	50	100	33	117	44	106	84	66
fox-1; hrpf-1	0.815516	105	195	17	133	53	97	92	58
fox-1; exc-7	2.73951e-09	99	201	33	117	23	127	17	133	21	129
fox-1; mbl-1	0.348119	102	198	58	92
fox-1; asd-1	7.87464e-25	111	189	6	144	17	133	8	142
fox-1; tiar-3	0.314354	123	177	69	81
fox-1; Y57G11C.9	0.599466	108	192	49	101
fox-1; tdp-1	0.297391	126	174	79	71	61	89	74	90
hrpf-1; exc-7	0.148129	99	201	65	85	53	97
hrpf-1; mbl-1	0.285061	102	198	43	107
hrpf-1; asd-1	0.0961607	111	189	74	76	58	92
hrpf-1; tiar-3	0.258685	123	177	52	98
hrpf-1; Y57G11C.9	0.0455447	108	192	70	80	63	87
hrpf-1; tdp-1	0.688839	144	156	68	82
exc-7; mbl-1	7.52013e-26	102	198	11	139	3	147	9	141
exc-7; asd-1	0.0727433	111	189	42	108
exc-7; tiar-3	1.39269e-05	123	177	45	105	48	110	37	115	33	117
exc-7; Y57G11C.9	0.754153	108	192	51	99
exc-7; tdp-1	0.415044	126	174	56	94
mbl-1; asd-1	0.0547151	105	195	39	111
mbl-1; tiar-3	0.0619194	117	183	45	105
mbl-1; Y57G11C.9	0.916244	102	198	52	98
mbl-1; tdp-1	0.0292465	120	180	44	106
asd-1; tiar-3	0.229678	129	171	73	77
asd-1; Y57G11C.9	0.0700171	114	186	71	79	66	84	66	84
asd-1; tdp-1	0.616017	132	168	70	80
tiar-3; Y57G11C.9	0.0405916	126	174	80	70	73	77
tiar-3; tdp-1	0.0293779	147	153	44	106	70	80	70	80
Y57G11C.9; tdp-1	0.316868	129	171	72	78
