# Supplementary material for: CRISPR-mediated genetic interaction profiling identifies RNA binding proteins controlling metazoan fitness
Source: eLife journal article supplement (doi:10.7554/elife.28129), 2017-07-18
Supplement: supp [file elife-28129-supp-v1.zip › elife_poa_e28129_Supplementary_File_3.xlsx]

## Sheet: Sheet1
wild type versus exc-7
gene ID	baseMean	baseMean wild type	baseMean exc-7	foldChange	log2FoldChange	pval	padj
WBGene00016670	1512.06	58.6393	2965.47	50.5715	5.66025	3.86e-16	9.35e-12
WBGene00013885	88.661	174.45	2.87246	0.0164658	-5.92438	8.89e-15	1.08e-10
WBGene00044783	109.982	8.43347	211.53	25.0822	4.64859	3.07e-11	2.48e-07
WBGene00021601	34.3356	1.86035	66.8109	35.9131	5.16644	5.57e-10	3.37e-06
WBGene00010446	113.498	3.73266	223.264	59.8135	5.9024	2.58e-09	1.25e-05
WBGene00044212	504.148	22.3741	985.923	44.0654	5.46157	5.06e-08	0.000204216
WBGene00020881	141.423	28.5618	254.284	8.90297	3.15429	4.16e-07	0.0014387
WBGene00044687	200.447	1.58774	399.307	251.493	7.97438	6.28e-07	0.00190169
WBGene00012069	41.3907	5.47318	77.3082	14.1249	3.82017	1.16e-06	0.00311678
WBGene00235133	140.184	22.9647	257.403	11.2086	3.48653	1.37e-06	0.00332515
WBGene00015450	1452.38	376.854	2527.9	6.70789	2.74586	1.63e-06	0.00359371
WBGene00015605	284.887	44.7726	525.001	11.7259	3.55163	1.96e-06	0.00387857
WBGene00050906	18.6864	0	37.3728	Inf	Inf	2.08e-06	0.00387857
WBGene00016669	538.73	57.0312	1020.43	17.8925	4.16128	3.3e-06	0.00570831
WBGene00013648	14.6991	1.58774	27.8104	17.5156	4.13057	1.16e-05	0.0166208
WBGene00015886	114.786	18.4876	211.085	11.4176	3.51319	1.17e-05	0.0166208
WBGene00044472	10.9888	0.400927	21.5766	53.8169	5.74999	1.06e-05	0.0166208
WBGene00015342	70.2304	0.562196	139.899	248.843	7.95909	1.27e-05	0.0171392
WBGene00003734	34.8212	1.93474	67.7077	34.9958	5.12911	1.78e-05	0.0218398
WBGene00007439	45.1305	6.22613	84.0349	13.4971	3.75458	1.89e-05	0.0218398
WBGene00007682	11.6499	0.930175	22.3697	24.0489	4.5879	1.84e-05	0.0218398
WBGene00015338	61.1949	1.68659	120.703	71.5665	6.16121	3.24e-05	0.0356664
WBGene00015593	36.0363	4.63838	67.4342	14.5383	3.86179	3.73e-05	0.0392876
wild type versus mbl-1
gene ID	baseMean	baseMean wild type	baseMean mbl-1	foldChange	log2FoldChange	pval	padj
WBGene00018028	61.6867	4.59913	118.774	25.8254	4.69072	8.7e-09	0.000204829
WBGene00235165	21.5485	42.7312	0.3658	0.0085605	-6.86809	1.62e-06	0.019036
wild type versus exc-7;mbl-1
gene ID	baseMean	baseMean wild type	baseMean double mutant	foldChange	log2FoldChange	pval	padj
WBGene00016845	3119.34	113.963	6124.73	53.7431	5.74801	5.04811e-27	1.20549e-22
WBGene00000610	285.832	11.1851	560.48	50.1095	5.64701	2.29707e-23	2.7427e-19
WBGene00006650	2309.03	127.078	4490.98	35.3402	5.14324	7.89076e-23	6.28105e-19
WBGene00021601	69.891	1.65804	138.124	83.3056	6.38034	2.3947e-18	1.42963e-14
WBGene00009963	87.721	4.08381	171.358	41.9604	5.39096	3.45843e-17	1.65175e-13
WBGene00013885	80.2011	156.495	3.90747	0.0249687	-5.32374	2.69041e-16	1.07078e-12
WBGene00044206	1843.22	231.757	3454.69	14.9065	3.89787	6.15413e-16	2.09944e-12
WBGene00044687	266.743	1.40753	532.079	378.022	8.56232	2.25784e-14	6.73964e-11
WBGene00018028	78.8689	5.19816	152.54	29.3449	4.87504	4.3043e-14	1.14208e-10
WBGene00007992	46.4186	1.49283	91.3444	61.1889	5.9352	1.11448e-13	2.66139e-10
WBGene00013637	68.1367	6.08846	130.185	21.3822	4.41834	2.231e-12	4.84329e-09
WBGene00010446	124.107	3.38273	244.831	72.3768	6.17746	2.86656e-12	5.70445e-09
WBGene00009706	498.988	48.4789	949.496	19.5858	4.29173	5.02362e-12	8.56887e-09
WBGene00044783	75.5709	7.58129	143.56	18.9362	4.24307	4.93744e-12	8.56887e-09
WBGene00015593	54.2366	4.17451	104.299	24.9847	4.64297	8.39585e-12	1.33662e-08
WBGene00016484	105.063	11.6891	198.437	16.9762	4.08545	9.46912e-12	1.41327e-08
WBGene00009895	3120.63	695.902	5545.36	7.96859	2.99433	1.30571e-10	1.83414e-07
WBGene00020242	80.69	10.6522	150.728	14.1499	3.82272	1.89844e-10	2.5186e-07
WBGene00008602	1214.71	307.007	2122.42	6.91325	2.78936	3.32943e-10	4.18457e-07
WBGene00044212	505.341	20.121	990.561	49.2301	5.62147	1.25993e-09	1.43272e-06
WBGene00235133	110.762	20.6353	200.889	9.73521	3.28321	1.23467e-09	1.43272e-06
WBGene00018803	411.855	69.3057	754.404	10.8852	3.44429	2.23941e-09	2.43077e-06
WBGene00007989	35.8588	3.72397	67.9937	18.2584	4.19049	2.54987e-09	2.64743e-06
WBGene00016064	445.046	113.719	776.374	6.8271	2.77127	3.65489e-09	3.63662e-06
WBGene00015605	407.573	40.2793	774.866	19.2373	4.26583	5.60073e-09	5.34982e-06
WBGene00012069	42.4845	4.93684	80.0322	16.2112	4.01892	7.63889e-09	7.01603e-06
WBGene00016063	164.215	15.1572	313.272	20.6682	4.36934	8.2608e-09	7.30622e-06
WBGene00007439	79.8093	5.58205	154.037	27.595	4.78634	1.07027e-08	9.12789e-06
WBGene00016052	779.857	51.1526	1508.56	29.4914	4.88222	1.32092e-08	1.08771e-05
WBGene00016483	176.719	28.2748	325.163	11.5001	3.52358	1.53868e-08	1.22479e-05
WBGene00018085	448.512	122.951	774.072	6.29576	2.65438	1.61591e-08	1.24477e-05
WBGene00008477	101.542	20.6887	182.396	8.81619	3.14016	1.99411e-08	1.47172e-05
WBGene00012593	1092	213.129	1970.87	9.2473	3.20903	2.03378e-08	1.47172e-05
WBGene00044472	16.3162	0.359841	32.2725	89.6856	6.4868	4.13909e-08	2.9071e-05
WBGene00006175	16.2084	0.255912	32.161	125.672	6.97352	4.31943e-08	2.94708e-05
WBGene00003092	202.487	54.6849	350.289	6.40558	2.67933	1.04214e-07	6.91283e-05
WBGene00018731	2758.22	915.603	4600.84	5.02493	2.3291	1.14045e-07	7.36054e-05
WBGene00016274	10079.2	16636	3522.34	0.21173	-2.2397	1.29007e-07	8.10709e-05
WBGene00009226	221.765	67.5877	375.942	5.56229	2.47568	2.65519e-07	0.000162579
WBGene00014698	23.1224	3.10822	43.1366	13.8782	3.79475	8.97953e-07	0.000536078
WBGene00016657	424.345	149.506	699.185	4.67664	2.22547	9.89791e-07	0.000576493
WBGene00018725	95.6863	27.0031	164.369	6.08706	2.60575	1.32679e-06	0.000754375
WBGene00016180	434.33	142.433	726.227	5.09873	2.35014	1.57877e-06	0.000876769
WBGene00011254	59.2916	14.736	103.847	7.04716	2.81704	1.70311e-06	0.000924325
WBGene00044213	164.909	56.6849	273.133	4.81845	2.26857	2.26972e-06	0.00120446
WBGene00018030	16.2119	1.23691	31.1868	25.2134	4.65612	2.50996e-06	0.001303
WBGene00015342	142.401	0.511824	284.291	555.446	9.1175	3.10861e-06	0.00157944
WBGene00008816	31.6725	3.76662	59.5783	15.8175	3.98345	3.57533e-06	0.00177872
WBGene00007682	54.2828	0.829019	107.737	129.957	7.02189	5.00323e-06	0.00243831
WBGene00017464	676.48	265.022	1087.94	4.10508	2.03741	7.84292e-06	0.00374578
WBGene00009213	209.919	69.2487	350.589	5.06275	2.33992	1.16064e-05	0.00543455
WBGene00021478	13.2531	1.19427	25.312	21.1946	4.40562	1.22521e-05	0.00562656
WBGene00007919	261.01	101.008	421.012	4.16812	2.0594	1.48215e-05	0.00658788
WBGene00013648	41.1461	1.40753	80.8846	57.4654	5.84462	1.48972e-05	0.00658788
WBGene00000503	331.481	100.907	562.056	5.57006	2.47769	1.56512e-05	0.00679548
WBGene00009892	8.36595	0	16.7319	Inf	Inf	1.778e-05	0.00751102
WBGene00045207	31.6857	6.88802	56.4834	8.20023	3.03566	1.79283e-05	0.00751102
WBGene00007804	210.043	59.9975	360.089	6.00173	2.58538	2.05144e-05	0.00809534
WBGene00016481	193.331	74.9315	311.731	4.1602	2.05665	2.07565e-05	0.00809534
WBGene00017660	288.84	115.883	461.798	3.98505	1.9946	2.10181e-05	0.00809534
WBGene00021121	412.551	68.2205	756.882	11.0946	3.47179	2.02509e-05	0.00809534
WBGene00021623	7.77053	15.5411	0	0	#NAME?	1.98394e-05	0.00809534
WBGene00050906	8.18327	0	16.3665	Inf	Inf	2.17166e-05	0.00823163
WBGene00175028	8.01353	0	16.0271	Inf	Inf	2.39234e-05	0.00892644
WBGene00019314	74.9957	24.3298	125.662	5.16493	2.36875	2.54551e-05	0.0093518
WBGene00003734	129.035	1.74874	256.321	146.575	7.1955	2.60744e-05	0.00943418
WBGene00010062	298.408	98.8134	498.002	5.03983	2.33337	2.68798e-05	0.00958043
WBGene00189961	12.592	0.871664	24.3124	27.8919	4.80178	2.9915e-05	0.0105055
WBGene00019931	116.567	43.3479	189.786	4.37821	2.13034	3.60832e-05	0.0123095
WBGene00044379	22.9219	2.61499	43.2287	16.5311	4.04711	3.59412e-05	0.0123095
WBGene00002094	37.8614	10.743	64.9799	6.04859	2.5966	3.75337e-05	0.012624
WBGene00015076	231.835	96.3009	367.369	3.8148	1.93161	3.96271e-05	0.0129629
WBGene00021621	12.6182	24.2554	0.981059	0.0404471	-4.62782	3.91961e-05	0.0129629
WBGene00018062	150.341	62.3258	238.355	3.82434	1.93521	4.58178e-05	0.0145884
WBGene00044900	13.7401	1.12758	26.3526	23.371	4.54665	4.54109e-05	0.0145884
WBGene00016119	183.672	80.882	286.461	3.54171	1.82445	4.88164e-05	0.0153386
WBGene00018389	11.5371	23.0742	0	0	#NAME?	5.44999e-05	0.0169021
WBGene00000213	121.482	27.8646	215.099	7.71945	2.9485	5.77838e-05	0.0176907
WBGene00009908	64.077	14.6658	113.488	7.73831	2.95202	6.3904e-05	0.0193168
WBGene00013079	916.3	454.724	1377.87	3.03013	1.59938	7.54342e-05	0.0225171
WBGene00003485	7804	3519.98	12088	3.43411	1.77994	8.41833e-05	0.0248185
WBGene00014006	1212.15	542.556	1881.74	3.46828	1.79422	8.71466e-05	0.0253788
WBGene00002118	116.207	32.5484	199.866	6.14059	2.61838	9.38475e-05	0.0266795
WBGene00012592	3556.54	1375.1	5737.99	4.17277	2.06101	9.34663e-05	0.0266795
WBGene00020870	42.3494	3.14546	81.5533	25.9273	4.6964	9.68903e-05	0.0272205
WBGene00018707	229.884	71.2468	388.521	5.45317	2.44709	0.000106893	0.0296814
WBGene00020881	174.281	25.6412	322.921	12.5938	3.65465	0.000110585	0.0303536
WBGene00021620	16.8249	30.1858	3.46406	0.114758	-3.12333	0.000122298	0.0331873
WBGene00020472	28.9614	6.30173	51.6211	8.19158	3.03414	0.000137038	0.0367694
WBGene00235165	26.0938	48.3772	3.81047	0.0787659	-3.66629	0.000145189	0.0385235
WBGene00015077	34.0387	4.15587	63.9216	15.381	3.94308	0.00015735	0.0412914
WBGene00006047	550.181	829.29	271.071	0.326872	-1.6132	0.000166768	0.0428216
WBGene00021176	36.3131	10.159	62.4671	6.14894	2.62034	0.000165113	0.0428216
WBGene00011672	321.709	135.762	507.656	3.7393	1.90277	0.000168733	0.0428654
WBGene00001768	901.68	434.406	1368.95	3.15133	1.65596	0.000173589	0.0436347
WBGene00002012	274.871	420.086	129.655	0.30864	-1.696	0.000176023	0.0437856
WBGene00012101	303.819	148.907	458.732	3.08066	1.62324	0.000183907	0.0452751
WBGene00006075	41.9698	9.62862	74.311	7.71772	2.94818	0.000200914	0.0489575
WBGene00014046	192.884	34.5879	351.18	10.1533	3.34387	0.000208272	0.0497591
WBGene00044471	6.20652	0	12.413	Inf	Inf	0.000208371	0.0497591
