# Supplementary material for: CRISPR-mediated genetic interaction profiling identifies RNA binding proteins controlling metazoan fitness
Source: eLife journal article supplement (doi:10.7554/elife.28129), 2017-07-18
Supplement: supp [file elife-28129-supp-v1.zip › elife_poa_e28129_Supplementary_File_4.xlsx]

## Sheet: Sheet1
gene name	chromosome	strand	junction 1 start	junction 1 end	junction 2 start	junction 2 end	wild type counts		exc-7 counts		mbl-1 counts		double mutant counts		wild type versus exc-7 Pvalue	wild type versus mbl-1 Pvalue	wild type versus double Pvalue		wild type junction_usage	exc-7 junction_usage	mbl-1 junction_usage	double junction_usage
ifb-2	chrII	+	5752722	5753454	5752722	5752816	2604	2925	2687	3217	3371	48	4610	65	0.0912246	0	0		0.470971	0.455115	0.985961	0.986096
ifb-2	chrII	+	5752722	5753454	5752868	5753454	2604	2580	2687	2808	3371	42	4610	64	0.169271	0	0		0.502315	0.48899	0.987694	0.986307
Y51H7C.13	chrII	-	1464469	1464561	1464322	1464561	783	7316	9468	43	313	2733	5675	24	0	0.335422	0		0.0966786	0.995479	0.102758	0.995789
epi-1	chrIV	+	10677603	10677932	10677603	10677673	399	1312	1685	103	767	781	1475	126	0	2.12346e-55	0		0.233197	0.942394	0.495478	0.921299
epi-1	chrIV	+	10677603	10677932	10677770	10677932	399	777	1685	61	767	396	1475	90	0	7.36636e-55	4.68656e-268		0.339286	0.965063	0.659501	0.942492
ZC434.9	chrI	+	10358496	10358982	10358496	10360188	277	776	508	1092	399	10	752	18	0.00270377	7.06147e-156	4.24235e-243		0.263058	0.3175	0.97555	0.976623
ZC434.9	chrI	+	10359946	10360188	10358496	10360188	586	776	804	1092	697	10	1049	18	0.746574	4.25644e-171	3.44227e-224		0.43025	0.424051	0.985856	0.98313
lec-3	chrII	+	9998730	9999201	9998582	9999201	1494	497	485	1669	782	328	518	1073	5.48068e-263	0.00587572	1.94888e-146		0.750377	0.225162	0.704505	0.325581
pqn-22	chrIV	-	6023852	6024449	6023290	6024449	509	801	19	1631	279	935	21	1256	2.33924e-179	6.18094e-18	9.72719e-145		0.38855	0.0115152	0.229819	0.0164448
lec-3	chrII	+	9998582	9998693	9998582	9999201	1436	497	505	1669	760	328	527	1073	1.61242e-245	0.00945497	4.01765e-137		0.742887	0.232291	0.698529	0.329375
F32A5.2	chrII	+	7246570	7247334	7247247	7247334	504	90	478	146	17	147	12	259	0.000282631	1.32598e-72	1.01346e-123		0.848485	0.766026	0.103659	0.0442804
F32A5.2	chrII	+	7246570	7247334	7246570	7246823	504	387	478	247	17	409	12	543	0.000148607	1.40447e-89	1.35747e-120		0.565657	0.65931	0.0399061	0.0216216
pqn-22	chrIV	-	6023852	6024449	6023054	6024449	509	352	19	467	279	417	21	495	1.52293e-105	8.46985e-14	4.74358e-109		0.591173	0.0390947	0.400862	0.0406977
Y39G8B.1	chrII	-	13971063	13971322	13970794	13971322	1639	592	2331	701	2804	125	2979	170	0.00481441	3.02478e-120	4.66201e-107		0.734648	0.768799	0.957323	0.946015
ajm-1	chrX	+	9109797	9109917	9109261	9109917	137	531	283	674	406	186	620	207	4.20939e-05	1.49557e-68	1.47e-102		0.20509	0.295716	0.685811	0.749698
gale-1	chrI	+	12975321	12975405	12975321	12975399	425	234	806	572	1048	16	1366	22	0.0102518	2.88855e-89	1.72483e-101		0.644917	0.584906	0.984962	0.98415
ajm-1	chrX	+	9109261	9109673	9109261	9109917	153	531	270	674	392	186	597	207	0.00500502	5.87478e-61	1.11027e-92		0.223684	0.286017	0.678201	0.742537
unc-43	chrIV	-	10326645	10327601	10326645	10329096	1126	1134	1586	1765	1664	407	2212	672	0.0680805	2.71811e-100	1.71231e-89		0.49823	0.473292	0.803477	0.76699
C04F5.8	chrV	-	5112628	5113007	5111952	5113007	0	88	1268	0	807	0	566	27	7.6335e-141	2.6858e-124	4.62682e-87		0	1	1	0.954469
C04F5.8	chrV	-	5111952	5112539	5111952	5113007	0	88	1179	0	738	0	474	27	3.69312e-138	4.59026e-121	4.29275e-81		0	1	1	0.946108
unc-43	chrIV	-	10327716	10329096	10326645	10329096	906	1134	1289	1765	1374	407	1757	672	0.125962	1.2134e-96	1.02804e-80		0.444118	0.422069	0.771477	0.723343
T23E7.2	chrX	+	17677245	17678929	17677245	17678670	533	1654	91	2614	331	1962	156	2551	1.59446e-112	3.10984e-17	4.00856e-79		0.243713	0.0336414	0.144352	0.0576284
C06A6.4	chrIV	-	7827106	7827568	7827463	7827568	1727	551	1837	752	863	673	698	796	0.000146301	9.33647e-37	5.49639e-74		0.758121	0.70954	0.561849	0.467202
pqn-72	chrI	-	3274164	3274929	3274164	3274275	201	359	119	394	202	2	361	47	5.46279e-06	8.79047e-67	1.5647e-65		0.358929	0.231969	0.990196	0.884804
pqn-72	chrI	-	3275011	3276665	3274813	3276665	211	177	169	225	173	0	381	0	0.00162621	2.61837e-36	1.15188e-64		0.543814	0.428934	1	1
dab-1	chrII	+	8228194	8228244	8228194	8228238	1428	884	2100	1066	1036	582	1779	334	0.000545236	0.149761	2.7633e-64		0.617647	0.663298	0.640297	0.841931
F32A5.2	chrII	+	7247247	7247811	7247247	7247334	149	90	0	146	95	147	0	259	3.40504e-43	4.83476e-07	8.23739e-64		0.623431	0	0.392562	0
lgc-22	chrIV	+	4302467	4302773	4302620	4302773	365	95	968	369	1170	0	1353	0	0.00304708	3.01612e-56	9.22151e-61		0.793478	0.724009	1	1
T23E7.2	chrX	+	17678773	17678929	17677245	17678929	689	533	1038	91	737	331	987	156	9.69023e-92	4.70933e-10	3.3849e-60		0.56383	0.919398	0.690075	0.863517
lgc-22	chrIV	+	4302467	4302773	4302467	4302571	365	94	968	390	1170	0	1353	0	0.00049419	1.06876e-55	3.63448e-60		0.795207	0.712813	1	1
frm-1	chrI	-	14878994	14881051	14880847	14881051	1285	527	1900	612	1440	128	1880	185	0.000532616	1.65082e-56	6.98265e-60		0.709161	0.756369	0.918367	0.910412
ifb-1	chrII	+	5765775	5769098	5769001	5769098	1884	350	2666	890	1174	767	2128	1119	1.21874e-17	4.07337e-68	4.49303e-56		0.84333	0.749719	0.604843	0.655374
lev-11	chrI	-	14622744	14622827	14622512	14622827	2526	3166	3021	3550	3057	1305	2776	1867	0.0776731	0	5.3993e-55		0.443781	0.459747	0.700825	0.597889
pat-12	chrIII	-	731805	731905	730438	731905	595	401	1105	345	675	189	1062	141	6.6129e-18	1.38572e-17	1.05003e-54		0.59739	0.762069	0.78125	0.882793
K10D6.2	chrV	-	11194060	11194773	11194343	11194773	130	44	82	318	109	228	61	457	7.08707e-35	4.89534e-20	1.88634e-54		0.747126	0.205	0.323442	0.117761
kin-20	chrX	-	15269727	15270659	15269727	15271226	238	453	437	571	486	154	754	298	0.000229683	1.14426e-53	8.86765e-54		0.344428	0.433532	0.759375	0.71673
mlt-11	chrV	+	20669772	20670006	20669745	20670006	7	58	87	197	401	168	458	22	0.000976196	3.22503e-21	1.45513e-51		0.107692	0.306338	0.704745	0.954167
pat-12	chrIII	-	730145	730591	730145	730308	364	345	678	304	394	180	727	122	1.75839e-13	4.32213e-10	6.04451e-50		0.513399	0.690428	0.686411	0.856302
T24B8.4	chrII	-	9065406	9067046	9066626	9067046	157	484	3	756	51	283	4	664	6.3433e-54	0.000732775	1.33688e-47		0.24493	0.00395257	0.152695	0.00598802
F13H8.5	chrII	-	6254593	6254663	6254247	6254663	478	1364	1040	1348	255	524	895	969	1.0461e-32	0.00050338	2.83891e-44		0.259501	0.435511	0.327343	0.48015
C23H3.2	chrII	+	61686	63077	62999	63077	303	485	737	750	822	454	882	390	4.4714e-07	9.03507e-31	2.53363e-43		0.384518	0.495629	0.644201	0.693396
etr-1	chrII	+	168394	168548	168048	168548	47	333	80	509	249	182	324	285	0.626533	1.73478e-43	2.38104e-41		0.123684	0.135823	0.577726	0.53202
F32A5.2	chrII	+	7246570	7247340	7247247	7247340	101	93	107	131	9	119	1	227	0.147688	1.12884e-18	2.70848e-41		0.520619	0.44958	0.0703125	0.00438596
Y57G11C.42	chrIV	+	14735043	14736751	14735996	14736751	111	253	5	509	34	152	3	475	7.8301e-41	0.00211348	3.49399e-41		0.304945	0.00972763	0.182796	0.00627615
adt-1	chrX	+	12681395	12681497	12681395	12681506	44	132	96	152	47	4	198	24	0.00334308	1.30974e-18	3.95631e-41		0.25	0.387097	0.921569	0.891892
kin-20	chrX	-	15270749	15271226	15269727	15271226	209	453	353	571	336	154	557	298	0.0066532	6.38086e-36	4.85994e-39		0.31571	0.382035	0.685714	0.651462
unc-22	chrIV	-	11993096	11993472	11993367	11993472	151	118	204	14	148	34	244	2	3.39183e-22	1.86856e-08	2.04775e-37		0.561338	0.93578	0.813187	0.99187
T23E7.2	chrX	+	17679670	17679921	17678773	17679921	828	768	916	1368	620	998	608	1364	5.05734e-13	1.30419e-14	2.90036e-37		0.518797	0.401051	0.383189	0.308316
nid-1	chrV	+	12914136	12915815	12914136	12914220	914	41	871	56	372	153	331	133	0.0953585	2.65513e-40	6.89804e-37		0.957068	0.93959	0.708571	0.713362
Y57G11C.42	chrIV	+	14735043	14736751	14735043	14735510	111	189	5	354	34	103	3	306	2.78296e-37	0.0120443	2.42702e-35		0.37	0.0139276	0.248175	0.00970874
K10D6.2	chrV	-	11194060	11194773	11194060	11194202	130	10	82	92	109	59	61	147	1.69433e-19	1.42371e-09	5.07546e-35		0.928571	0.471264	0.64881	0.293269
T06G6.6	chrI	+	12718440	12718954	12718848	12718954	141	78	703	236	967	43	877	36	0.00231264	2.86132e-34	1.75634e-34		0.643836	0.748669	0.957426	0.96057
F32A5.2	chrII	+	7246570	7247340	7246570	7246823	101	387	107	247	9	409	1	543	0.00205509	5.68379e-20	1.93053e-34		0.206967	0.30226	0.0215311	0.00183824
unc-13	chrI	+	7444152	7445011	7444152	7445376	94	16	120	61	54	63	18	128	0.000332777	3.89861e-10	4.51099e-34		0.854545	0.662983	0.461538	0.123288
T06G6.6	chrI	+	12718440	12718954	12718440	12718766	141	76	703	194	967	36	877	36	6.52744e-05	8.3357e-36	2.2004e-33		0.64977	0.783724	0.964108	0.96057
tag-241	chrX	+	11834126	11834843	11834517	11834843	121	55	62	182	63	134	41	248	5.36313e-19	1.08941e-12	2.35442e-33		0.6875	0.254098	0.319797	0.141869
wrk-1	chrX	-	8389743	8390949	8389743	8390598	42	858	391	697	41	491	178	529	7.95563e-72	0.0193267	2.59512e-33		0.0466667	0.359375	0.0770677	0.251768
wrk-1	chrX	-	8389743	8390949	8390623	8390949	42	813	391	624	41	456	178	504	1.1382e-74	0.0182754	5.81485e-33		0.0491228	0.385222	0.082495	0.260997
dab-1	chrII	+	8227477	8227558	8227477	8227552	827	717	1249	873	585	522	983	328	0.00150946	0.722562	9.73703e-33		0.535622	0.588596	0.528455	0.749809
unc-52	chrII	-	14659814	14661743	14661115	14661743	827	75	757	311	900	93	785	317	4.80652e-33	0.466595	2.19048e-32		0.916851	0.708801	0.906344	0.712341
unc-13	chrI	+	7445021	7445376	7444152	7445376	86	16	112	61	48	63	17	128	0.000475102	4.74629e-10	3.36583e-32		0.843137	0.647399	0.432432	0.117241
unc-104	chrII	+	7008395	7008624	7008404	7008624	110	41	123	66	11	129	18	152	0.128832	6.28936e-32	8.47336e-32		0.728477	0.650794	0.0785714	0.105882
unc-22	chrIV	-	11993096	11993339	11993096	11993472	94	151	8	204	29	148	1	244	3.59684e-21	8.356e-07	8.77382e-32		0.383673	0.0377358	0.163842	0.00408163
unc-62	chrV	+	4505517	4505828	4505121	4505828	200	389	274	423	363	193	463	234	0.0487642	1.51553e-26	1.48617e-31		0.339559	0.393113	0.652878	0.664275
C54G10.4	chrV	-	14654451	14654902	14653929	14654902	102	24	151	29	18	90	20	128	0.54095	5.95903e-24	4.20531e-31		0.809524	0.838889	0.166667	0.135135
nas-37	chrX	-	9946175	9946537	9946175	9946297	153	84	240	343	178	583	160	547	1.41897e-09	1.84197e-30	4.4647e-31		0.64557	0.411664	0.233903	0.226308
unc-62	chrV	+	4504231	4504974	4504231	4505358	221	132	224	178	87	280	102	349	0.0637532	2.27859e-26	6.48937e-31		0.626062	0.557214	0.237057	0.226164
pat-12	chrIII	-	730145	731531	730145	730308	71	345	80	304	88	180	172	122	0.176446	3.03926e-06	1.22792e-30		0.170673	0.208333	0.328358	0.585034
ptc-1	chrII	+	7893488	7893538	7893488	7893529	361	565	495	610	329	301	417	190	0.00887768	2.62387e-07	1.86939e-30		0.389849	0.447964	0.522222	0.686985
nid-1	chrV	+	12914136	12915815	12915556	12915815	914	127	871	221	372	207	331	200	5.66023e-07	3.54709e-28	1.89104e-30		0.878002	0.797619	0.642487	0.623352
fbl-1	chrIV	+	9544346	9545333	9544346	9544494	28	358	90	274	39	124	114	132	2.91927e-11	2.44321e-07	2.18823e-30		0.0725389	0.247253	0.239264	0.463415
T23E7.2	chrX	+	17677990	17678929	17677245	17678929	425	533	490	91	259	331	437	156	1.00085e-57	0.874478	2.39765e-30		0.443633	0.843373	0.438983	0.736931
R107.5	chrIII	-	9052372	9052421	9052378	9052421	679	1004	997	1078	609	720	794	499	2.36338e-06	0.00266526	4.28002e-30		0.403446	0.480482	0.458239	0.614076
srap-1	chrII	+	11218915	11219457	11218368	11219457	114	114	109	248	96	402	87	617	3.39726e-06	1.2633e-16	7.89192e-30		0.5	0.305322	0.192771	0.12358
aqp-2	chrII	-	9259385	9259589	9259385	9259670	1130	578	2076	1288	1214	1571	1711	1738	0.00206074	2.00182e-49	1.20088e-29		0.661593	0.617122	0.435907	0.496086
alh-4	chrV	-	6427334	6428045	6427956	6428045	351	177	477	158	360	60	479	33	0.00142327	6.74514e-12	1.88054e-29		0.664773	0.751181	0.857143	0.935547
aqp-2	chrII	-	9259618	9259670	9259385	9259670	1026	578	1915	1288	1107	1571	1572	1738	0.00521885	7.27379e-47	1.40125e-27		0.639651	0.597877	0.413368	0.474924
T25B2.2	chrX	+	6172495	6172637	6172564	6172637	391	9	349	25	64	42	93	55	0.00270713	1.13306e-23	3.64419e-26		0.9775	0.933155	0.603774	0.628378
blmp-1	chrI	+	10412947	10413492	10412947	10413361	81	151	160	267	14	463	22	466	0.553634	3.07424e-30	7.34328e-26		0.349138	0.374707	0.0293501	0.045082
npp-19	chrII	-	10796975	10797017	10796966	10797017	784	268	1007	469	507	382	507	463	0.000626193	5.7421e-16	1.74414e-25		0.745247	0.682249	0.570304	0.52268
Y57G11C.9	chrIV	+	14789515	14790147	14789515	14789849	795	558	1017	797	527	570	485	776	0.136655	1.42093e-07	3.34569e-25		0.587583	0.560639	0.480401	0.384615
egl-15	chrX	+	11022206	11022379	11021944	11022379	8	82	29	138	59	35	106	34	0.0924389	5.80591e-15	3.88051e-25		0.0888889	0.173653	0.62766	0.757143
rskn-1	chrI	-	8574346	8574432	8574340	8574432	607	393	791	547	427	389	230	426	0.443261	0.00035401	1.14992e-24		0.607	0.591181	0.523284	0.35061
pqn-22	chrIV	-	6023586	6024449	6023054	6024449	140	352	76	467	49	417	28	495	1.16079e-08	1.5371e-12	2.32936e-24		0.284553	0.139963	0.10515	0.0535373
cfim-2	chrIV	+	8926426	8926477	8926426	8926471	332	443	482	540	396	302	471	215	0.0692691	1.01063e-07	2.44787e-23		0.428387	0.471624	0.567335	0.686589
etr-1	chrII	+	168394	168542	168394	168548	216	47	270	80	196	249	289	324	0.158513	2.31595e-24	5.38548e-23		0.821293	0.771429	0.440449	0.471452
blmp-1	chrI	+	10412947	10413492	10413410	10413492	81	170	160	269	14	430	22	444	0.212729	1.99456e-26	9.76096e-23		0.322709	0.37296	0.0315315	0.0472103
C33G8.2	chrV	+	7010281	7010505	7010281	7010377	282	89	434	96	265	3	250	0	0.0361008	1.63781e-19	1.11385e-22		0.760108	0.818868	0.988806	1
pes-8	chrX	+	9253844	9254145	9253625	9254145	292	362	293	606	39	203	118	492	1.38296e-06	3.70901e-16	2.96992e-22		0.446483	0.325918	0.161157	0.193443
spat-2	chrIII	+	11056277	11057283	11056277	11057277	533	495	792	601	580	332	711	267	0.014848	1.96411e-07	4.56941e-22		0.518482	0.568557	0.635965	0.726994
dcp-66	chrI	-	7539260	7539302	7539251	7539302	389	310	508	523	255	376	214	492	0.0094011	2.8146e-08	8.21715e-22		0.556509	0.492726	0.40412	0.303116
C33G8.2	chrV	+	7010402	7010505	7010281	7010505	84	282	90	434	3	265	0	250	0.0390787	2.23676e-18	1.5641e-21		0.229508	0.171756	0.011194	0
sma-1	chrV	+	11914581	11915716	11915360	11915716	80	37	59	50	56	163	78	307	0.0296296	2.93895e-14	1.83321e-21		0.683761	0.541284	0.255708	0.202597
nas-4	chrIII	-	6412475	6412768	6411933	6412768	39	58	209	69	210	25	256	32	1.01763e-09	1.16077e-19	1.73286e-20		0.402062	0.751799	0.893617	0.888889
kvs-5	chrIV	+	748739	748812	742318	748812	96	112	281	133	311	110	414	93	2.49347e-07	1.73344e-11	1.78088e-20		0.461538	0.678744	0.738717	0.816568
pes-8	chrX	+	9253625	9253708	9253625	9254145	446	362	588	606	84	203	230	492	0.00938702	2.48478e-14	3.10112e-20		0.55198	0.492462	0.292683	0.31856
C53B4.4	chrIV	+	8983849	8983947	8983849	8983954	535	405	643	575	340	352	299	550	0.0608148	0.00186219	3.75834e-20		0.569149	0.527915	0.491329	0.352179
frm-4	chrI	-	5403966	5404520	5404356	5404520	305	479	258	769	71	461	124	582	5.03286e-10	2.65127e-25	4.22681e-20		0.389031	0.251217	0.133459	0.175637
fbl-1	chrIV	+	9542293	9542967	9542869	9542967	36	290	66	255	55	138	102	124	0.00113766	7.40221e-07	1.14906e-19		0.110429	0.205607	0.284974	0.451327
T24B8.4	chrII	-	9065406	9067046	9065406	9066055	157	123	3	174	51	41	4	80	1.14062e-39	1	2.05788e-19		0.560714	0.0169492	0.554348	0.047619
unc-52	chrII	-	14657492	14658474	14657098	14658474	176	42	58	37	138	58	62	109	0.000368204	0.0158452	2.40354e-19		0.807339	0.610526	0.704082	0.362573
sqv-5	chrI	+	9948212	9949086	9948212	9949092	310	267	347	360	206	260	122	342	0.103734	0.00229464	2.5311e-19		0.537262	0.490806	0.44206	0.262931
K07H8.2	chrIV	+	8291836	8292764	8291836	8292776	453	446	593	647	349	362	153	416	0.254649	0.615953	2.77791e-19		0.503893	0.478226	0.490858	0.268893
lin-42	chrII	-	1236390	1239948	1236390	1237823	84	462	336	845	492	868	482	889	1.93086e-09	2.16214e-20	5.77713e-19		0.153846	0.284505	0.361765	0.351568
C53B4.4	chrIV	+	8983648	8983693	8983648	8983702	234	284	276	449	161	316	103	424	0.0140044	0.000277424	6.04883e-19		0.451737	0.38069	0.337526	0.195446
epn-1	chrX	-	14817620	14817674	14817626	14817674	323	334	750	491	486	295	694	286	2.90586e-06	6.87706e-07	1.10698e-18		0.491629	0.604351	0.622279	0.708163
him-4	chrX	+	9751540	9751814	9751540	9751745	487	78	469	211	395	119	380	212	3.57957e-13	7.71432e-05	2.62356e-18		0.861947	0.689706	0.768482	0.641892
F07F6.4	chrII	-	5426597	5427573	5427482	5427573	1057	400	1991	134	911	433	1442	251	8.65872e-68	0.00631641	3.24029e-18		0.725463	0.936941	0.677827	0.851742
suox-1	chrX	+	15498522	15498606	15498522	15498730	77	151	102	204	49	271	19	319	0.926392	6.1129e-07	3.34168e-18		0.337719	0.333333	0.153125	0.056213
F08G5.3	chrIV	-	12413240	12413853	12413802	12413853	38	92	83	113	73	34	125	32	0.0191827	2.54218e-09	3.76169e-18		0.292308	0.423469	0.682243	0.796178
dnc-1	chrIV	-	10931952	10932236	10931952	10932478	295	91	399	108	308	21	327	9	0.418518	1.16939e-10	5.81466e-18		0.764249	0.786982	0.93617	0.973214
F26F12.3	chrV	-	5844233	5845637	5844233	5844322	209	3	340	38	186	2	291	103	2.7929e-05	1	5.82847e-18		0.985849	0.899471	0.989362	0.738579
K10D6.2	chrV	-	11194343	11194773	11194628	11194773	44	110	318	193	228	240	457	234	2.25724e-13	1.03046e-05	1.90372e-17		0.285714	0.622309	0.487179	0.66136
elt-2	chrX	+	10482984	10483099	10482942	10483099	51	259	39	280	115	141	141	150	0.139722	1.20501e-13	2.87521e-17		0.164516	0.122257	0.449219	0.484536
frm-4	chrI	-	5403966	5404256	5403966	5404520	437	305	613	258	433	71	496	124	1.78517e-06	7.65506e-26	3.43027e-17		0.588949	0.703789	0.859127	0.8
F10G8.8	chrI	-	10051605	10052407	10051605	10052204	24	31	74	118	0	134	0	165	0.53351	1.64375e-15	3.4345e-17		0.436364	0.385417	0	0
Y69H2.3	chrV	-	18659518	18661087	18660966	18661087	51	149	0	195	88	145	0	188	2.77765e-17	0.00725501	6.16908e-17		0.255	0	0.377682	0
unc-52	chrII	-	14659368	14661743	14661115	14661743	143	75	139	311	100	93	145	317	2.29162e-17	0.00495178	6.48925e-17		0.655963	0.308889	0.518135	0.313853
pak-2	chrV	-	11038981	11039027	11038987	11039027	293	202	353	235	273	140	330	61	0.80371	0.0332604	9.71844e-17		0.591919	0.60034	0.661017	0.84399
frm-4	chrI	-	5403966	5405314	5403966	5404520	290	305	546	258	198	71	347	124	6.29875e-13	6.36952e-12	1.13824e-16		0.487395	0.679104	0.736059	0.73673
mig-5	chrII	-	8182640	8182789	8182627	8182789	373	238	437	277	264	255	149	277	0.954988	0.000606694	1.5018e-16		0.610475	0.612045	0.508671	0.349765
Y95D11A.3	chrI	+	10941304	10941573	10941304	10941582	188	101	246	239	115	122	94	205	9.99576e-05	0.000189483	3.15894e-16		0.650519	0.507216	0.485232	0.314381
cls-2	chrIII	+	9058222	9058263	9058222	9058272	423	251	457	399	306	262	291	420	0.000263583	0.00177722	3.80755e-16		0.627596	0.533879	0.538732	0.409283
lfi-1	chrX	+	4984570	4984789	4984206	4984789	59	108	52	122	2	102	1	126	0.299815	1.65029e-12	4.86514e-16		0.353293	0.298851	0.0192308	0.00787402
dnj-5	chrII	-	6854144	6854193	6854150	6854193	301	463	463	543	321	331	470	314	0.00575011	0.000210925	5.40636e-16		0.393979	0.460239	0.492331	0.59949
K10D6.2	chrV	-	11194060	11194773	11194628	11194773	130	110	82	193	109	240	61	234	2.34139e-08	3.92301e-08	1.17931e-15		0.541667	0.298182	0.312321	0.20678
suox-1	chrX	+	15498893	15498947	15498631	15498947	163	88	261	108	265	21	260	21	0.135306	5.44621e-16	1.2588e-15		0.649402	0.707317	0.926573	0.925267
Y69A2AR.1	chrIV	+	2667250	2667364	2667250	2667355	244	504	380	651	332	316	357	310	0.0700196	1.84499e-12	1.95307e-15		0.326203	0.368574	0.512346	0.535232
T24B8.4	chrII	-	9065406	9066466	9065406	9066055	68	123	223	174	67	41	209	80	2.95668e-06	1.23715e-05	1.95816e-15		0.356021	0.561713	0.62037	0.723183
egl-8	chrV	+	31583	35014	30298	35014	174	145	180	182	96	207	86	264	0.219368	8.55405e-09	2.08526e-15		0.545455	0.497238	0.316832	0.245714
srap-1	chrII	+	11218368	11219457	11218368	11218449	114	67	248	100	402	101	617	73	0.0609347	1.26134e-05	2.57434e-15		0.629834	0.712644	0.799205	0.894203
abu-12	chrX	-	452883	453976	452883	454287	32	37	73	3	27	32	101	3	4.2835e-12	1	2.8986e-15		0.463768	0.960526	0.457627	0.971154
lin-10	chrI	-	8115309	8116642	8115868	8116642	52	259	64	264	87	118	123	137	0.411564	1.93057e-10	3.44872e-15		0.167203	0.195122	0.42439	0.473077
dur-1	chrIV	-	9922696	9923247	9923138	9923247	29	81	0	220	23	113	0	203	8.9371e-16	0.0844204	4.4481e-15		0.263636	0	0.169118	0
M4.1	chrIV	+	3214235	3214512	3214235	3214506	170	359	254	430	168	255	247	183	0.0782454	0.0170379	4.55519e-15		0.321361	0.371345	0.397163	0.574419
fbl-1	chrIV	+	9541754	9542034	9541754	9542727	45	340	59	264	60	132	96	152	0.0144508	3.99256e-08	4.70724e-15		0.116883	0.182663	0.3125	0.387097
mei-1	chrI	+	8296222	8296540	8296222	8296549	369	359	452	469	252	349	151	373	0.519555	0.00163509	7.92569e-15		0.506868	0.490771	0.419301	0.288168
F28F8.5	chrV	-	15575075	15575338	15575069	15575338	478	204	548	344	340	238	292	307	0.000349698	3.32631e-05	8.86418e-15		0.70088	0.61435	0.588235	0.487479
lin-41	chrI	-	9338805	9338855	9338817	9338855	237	267	312	288	228	192	254	92	0.103102	0.0293641	1.49939e-14		0.470238	0.52	0.542857	0.734104
lst-4	chrIV	-	14063025	14063070	14063031	14063070	252	402	488	468	272	311	381	255	7.719e-07	0.00398765	1.87042e-14		0.385321	0.51046	0.466552	0.599057
ZC434.9	chrI	+	10358496	10359423	10358496	10360188	226	776	113	1092	58	10	43	18	1.46636e-17	8.62143e-26	2.32588e-14		0.225549	0.0937759	0.852941	0.704918
phat-1	chrI	-	5044696	5045065	5044984	5045065	138	35	165	75	127	0	225	0	0.0131942	1.00143e-09	2.51394e-14		0.797688	0.6875	1	1
ddx-19	chrII	+	8885543	8887036	8885389	8887036	69	130	134	138	96	68	125	44	0.00186251	7.88081e-06	4.74821e-14		0.346734	0.492647	0.585366	0.739645
F56C9.10	chrIII	-	7333423	7333607	7333432	7333607	304	329	457	431	295	232	433	195	0.193631	0.00790959	5.61774e-14		0.480253	0.51464	0.559772	0.68949
nurf-1	chrII	+	14403699	14406374	14405891	14406374	290	62	383	183	217	115	327	227	8.03134e-07	3.70074e-07	5.74302e-14		0.823864	0.676678	0.653614	0.590253
spv-1	chrII	-	7912964	7913997	7913308	7913997	69	71	36	147	54	114	47	270	2.4471e-08	0.00244153	6.72704e-14		0.492857	0.196721	0.321429	0.148265
tom-1	chrI	+	5554865	5555025	5553370	5555025	135	50	123	143	120	88	98	165	1.63534e-08	0.00208593	7.43344e-14		0.72973	0.462406	0.576923	0.372624
dpff-1	chrIII	-	5905907	5906032	5905913	5906032	286	353	358	473	313	253	397	207	0.525057	0.000276328	1.03717e-13		0.447574	0.430806	0.553004	0.657285
sli-1	chrX	-	725268	725706	725268	725540	90	83	184	98	167	30	251	47	0.00577468	1.04977e-11	1.14705e-13		0.520231	0.652482	0.847716	0.842282
unc-53	chrII	-	11061148	11061248	11061148	11061841	5	38	18	63	33	7	60	14	0.224295	3.15341e-11	1.35815e-13		0.116279	0.222222	0.825	0.810811
T25D3.4	chrII	+	147336	147381	147336	147388	141	237	218	401	113	238	68	385	0.540635	0.161622	1.57655e-13		0.373016	0.352181	0.321937	0.15011
lev-10	chrI	+	14398858	14399417	14398858	14399622	13	216	26	226	44	156	81	180	0.0674825	6.65484e-07	1.64621e-13		0.0567686	0.103175	0.22	0.310345
panl-3	chrIII	+	9819947	9820165	9819947	9820159	215	303	371	372	283	198	334	185	0.00342436	4.88592e-08	1.71236e-13		0.415058	0.499327	0.588358	0.643545
F44E2.10	chrIII	-	8829793	8829847	8829805	8829847	291	262	390	333	350	158	488	182	0.650858	6.22014e-08	2.63713e-13		0.526221	0.539419	0.688976	0.728358
egl-8	chrV	+	28700	29335	26381	29335	73	113	91	169	246	80	262	104	0.371504	6.29191e-16	3.28364e-13		0.392473	0.35	0.754601	0.715847
spr-4	chrI	+	8108259	8108732	8108259	8108726	199	144	333	205	249	111	389	89	0.259008	0.00223151	3.29254e-13		0.580175	0.618959	0.691667	0.813808
srap-1	chrII	+	11208533	11209126	11209045	11209126	16	21	9	74	11	71	0	145	0.000144247	0.000692369	3.66515e-13		0.432432	0.108434	0.134146	0
dex-1	chrIII	+	5533769	5535191	5533769	5533876	40	132	108	124	39	47	137	95	1.42122e-06	0.000525477	3.91589e-13		0.232558	0.465517	0.453488	0.590517
nab-1	chrI	+	4231226	4232495	4231226	4231573	108	18	134	75	73	45	117	125	1.56014e-05	3.30954e-05	5.23683e-13		0.857143	0.641148	0.618644	0.483471
frm-1	chrI	-	14880132	14880609	14878994	14880609	477	215	607	175	82	103	103	139	0.000189738	1.83798e-09	8.0165e-13		0.689306	0.776215	0.443243	0.42562
bet-1	chrI	-	4526713	4527741	4526704	4527741	264	162	359	299	159	195	159	264	0.0168879	2.56693e-06	1.24259e-12		0.619718	0.545593	0.449153	0.375887
egl-8	chrV	+	26381	30199	29516	30199	126	126	118	175	37	191	50	201	0.0248305	2.30308e-15	1.33096e-12		0.5	0.40273	0.162281	0.199203
Y54G2A.73	chrIV	-	3006091	3006141	3006084	3006141	108	156	97	221	46	153	26	186	0.0113973	6.35915e-05	1.49763e-12		0.409091	0.305031	0.231156	0.122642
frm-4	chrI	-	5403966	5405314	5404356	5405314	290	29	546	59	198	114	347	143	0.81404	4.94261e-17	1.63942e-12		0.909091	0.902479	0.634615	0.708163
grd-6	chrV	+	9223216	9223484	9223240	9223484	90	24	109	174	146	44	68	115	1.67784e-13	0.776368	1.66684e-12		0.789474	0.385159	0.768421	0.371585
lin-36	chrIII	-	8019851	8019957	8019857	8019957	101	376	172	464	123	267	165	213	0.0245023	0.00059346	2.00955e-12		0.21174	0.27044	0.315385	0.436508
grsp-2	chrIV	+	8817994	8818305	8818154	8818305	14	63	54	26	56	30	32	5	3.91742e-10	1.00977e-09	2.03111e-12		0.181818	0.675	0.651163	0.864865
pqn-22	chrIV	-	6023586	6023794	6023586	6024449	327	140	12	76	171	49	2	28	1.44435e-23	0.0355878	2.85002e-12		0.700214	0.136364	0.777273	0.0666667
B0034.1	chrII	+	5971121	5971596	5971070	5971596	114	136	128	84	58	30	167	50	0.00200578	0.00122647	3.29456e-12		0.456	0.603774	0.659091	0.769585
nhl-2	chrIII	-	4898537	4898835	4898531	4898835	202	262	257	376	156	221	98	349	0.352876	0.574877	3.58837e-12		0.435345	0.406003	0.413793	0.219239
egl-8	chrV	+	30298	35014	30298	31339	145	170	182	128	207	75	264	102	0.00177394	1.07729e-11	4.0055e-12		0.460317	0.587097	0.734043	0.721311
ash-2	chrII	+	11980721	11980771	11980721	11980765	191	152	383	186	241	129	302	77	0.000517447	0.0113478	4.1467e-12		0.556851	0.673111	0.651351	0.796834
Y55B1BR.5	chrIII	-	454392	455044	454392	455089	35	37	50	46	70	14	99	6	0.75535	6.07091e-06	4.47426e-12		0.486111	0.520833	0.833333	0.942857
sli-1	chrX	-	725268	725706	725592	725706	90	81	184	99	167	40	251	52	0.010096	6.46113e-09	4.56311e-12		0.526316	0.650177	0.806763	0.828383
C14A4.12	chrII	+	10614150	10614379	10614261	10614379	12	64	11	89	35	34	63	30	0.374259	7.72229e-06	6.88549e-12		0.157895	0.11	0.507246	0.677419
M03C11.3	chrIII	+	10408288	10408369	10408288	10408361	112	272	150	274	124	207	162	130	0.0605197	0.0207499	7.46077e-12		0.291667	0.353774	0.374622	0.554795
Y43F8B.3	chrV	+	19504105	19506370	19506060	19506370	194	23	191	43	61	117	152	92	0.0231597	1.5459e-31	8.99577e-12		0.894009	0.816239	0.342697	0.622951
C05G5.2	chrX	+	14749962	14750013	14749962	14750006	120	32	185	40	156	21	216	2	0.426865	0.0345155	1.23365e-11		0.789474	0.822222	0.881356	0.990826
kvs-5	chrIV	+	751289	751582	751435	751582	172	151	266	381	251	405	285	612	0.000371401	1.07919e-05	1.50671e-11		0.532508	0.411128	0.382622	0.317726
vab-10	chrI	-	11771334	11773417	11762250	11773417	213	130	195	238	177	157	186	299	2.46404e-06	0.0195691	1.65689e-11		0.620991	0.450346	0.52994	0.383505
C50B8.6	chrV	+	13579497	13580392	13579497	13579646	156	314	103	341	9	165	26	215	0.000935633	1.92041e-15	1.72823e-11		0.331915	0.231982	0.0517241	0.107884
R17.3	chrIII	+	10836502	10837422	10836535	10837422	292	38	219	53	71	51	124	72	0.00833732	9.14333e-12	1.92902e-11		0.884848	0.805147	0.581967	0.632653
K02E2.8	chrV	-	20366827	20366868	20366709	20366868	486	10	314	14	109	39	142	30	0.0882744	1.91058e-18	2.04509e-11		0.979839	0.957317	0.736486	0.825581
W09D12.1	chrV	-	14918921	14919297	14918921	14919735	260	368	430	705	136	531	318	908	0.153822	2.29843e-16	2.05051e-11		0.414013	0.378855	0.203898	0.25938
lfi-1	chrX	+	4984206	4984479	4984206	4984774	102	50	97	33	4	34	5	39	0.190719	1.43669e-10	2.16375e-11		0.671053	0.746154	0.105263	0.113636
dnc-1	chrIV	-	10932554	10932594	10932321	10932594	98	210	116	280	27	221	26	247	0.508929	1.99186e-09	2.16617e-11		0.318182	0.292929	0.108871	0.0952381
R03C1.1	chrII	-	14908135	14908277	14908135	14909491	280	20	250	40	77	9	138	57	0.00605013	0.248681	2.23471e-11		0.933333	0.862069	0.895349	0.707692
egl-15	chrX	+	11022069	11022379	11021944	11022379	20	82	56	138	36	35	65	34	0.0937541	2.87054e-05	2.62465e-11		0.196078	0.28866	0.507042	0.656566
mlt-11	chrV	+	20668103	20668172	20667643	20668172	31	18	118	124	126	357	81	386	0.0841594	2.78664e-07	3.15596e-11		0.632653	0.487603	0.26087	0.173448
ash-2	chrII	+	11982255	11983000	11982255	11983009	173	209	218	341	122	254	96	321	0.059365	0.000342974	3.22679e-11		0.45288	0.389982	0.324468	0.230216
abts-1	chrI	-	8304382	8304478	8304382	8306223	206	240	176	283	108	258	94	293	0.0184948	1.18444e-06	3.9065e-11		0.461883	0.383442	0.295082	0.242894
K10D6.2	chrV	-	11194060	11194573	11194060	11194202	103	10	186	92	238	59	219	147	2.27692e-07	0.00755202	4.48403e-11		0.911504	0.669065	0.801347	0.598361
C14A4.12	chrII	+	10614150	10614200	10614150	10614379	80	12	100	11	49	35	48	63	0.511688	1.83877e-05	5.46946e-11		0.869565	0.900901	0.583333	0.432432
C50B8.6	chrV	+	13579497	13580392	13579779	13580392	156	404	103	488	9	213	26	260	2.91991e-05	4.43169e-16	5.63298e-11		0.278571	0.174281	0.0405405	0.0909091
unc-36	chrIII	-	8198224	8199141	8197829	8199141	9	100	38	118	30	72	55	64	0.000587602	7.77393e-05	6.22364e-11		0.0825688	0.24359	0.294118	0.462185
rdy-2	chrV	-	13598726	13599068	13598970	13599068	24	26	15	100	11	39	2	85	4.84608e-06	0.0113443	6.60696e-11		0.48	0.130435	0.22	0.0229885
pkc-2	chrX	+	9371196	9380051	9365845	9380051	440	149	439	197	166	133	160	144	0.0307615	1.34614e-08	7.01893e-11		0.747029	0.690252	0.555184	0.526316
unc-52	chrII	-	14657098	14658474	14657920	14658474	42	247	37	307	58	134	109	176	0.183963	5.16491e-05	7.75049e-11		0.145329	0.107558	0.302083	0.382456
mps-2	chrII	-	310444	312065	310444	310620	264	98	247	128	133	53	68	91	0.0382393	0.762202	7.97574e-11		0.729282	0.658667	0.715054	0.427673
mig-15	chrX	-	10423812	10424231	10423812	10424121	134	43	307	9	227	31	369	19	3.02585e-13	0.00109219	8.09967e-11		0.757062	0.971519	0.879845	0.951031
lin-10	chrI	-	8115309	8116642	8115309	8115783	52	285	64	341	87	167	123	206	0.919384	1.56094e-07	9.30708e-11		0.154303	0.158025	0.34252	0.37386
T19D12.1	chrII	+	6668099	6668680	6668363	6668680	10	132	17	103	23	52	44	64	0.0679565	1.28507e-05	1.15757e-10		0.0704225	0.141667	0.306667	0.407407
T04B8.5	chrII	-	620975	621139	620975	624389	153	115	170	162	112	195	99	222	0.161845	1.05832e-06	1.65566e-10		0.570896	0.512048	0.364821	0.308411
unc-11	chrI	-	3800280	3803010	3800280	3800808	144	52	111	58	110	63	58	90	0.110776	0.0433439	1.90558e-10		0.734694	0.656805	0.635838	0.391892
Y43F8B.3	chrV	+	19507835	19514354	19514254	19514354	211	40	201	69	65	123	167	115	0.00716911	8.21764e-27	1.92179e-10		0.840637	0.744444	0.345745	0.592199
ZK688.5	chrIII	-	7886270	7886423	7886264	7886423	217	138	354	321	151	218	173	277	0.00833398	5.50304e-08	2.17498e-10		0.611268	0.524444	0.409214	0.384444
F55A12.5	chrI	+	5347277	5347318	5347277	5347327	317	120	407	168	247	129	183	178	0.573857	0.0393341	2.26265e-10		0.7254	0.707826	0.656915	0.506925
F45F2.10	chrV	-	8514872	8514911	8514863	8514911	221	130	278	216	151	135	127	201	0.0554017	0.00988095	2.64712e-10		0.62963	0.562753	0.527972	0.387195
rbf-1	chrIII	+	6698911	6699243	6698911	6699076	47	13	53	41	21	50	30	79	0.00579501	2.91715e-08	2.70078e-10		0.783333	0.56383	0.295775	0.275229
taf-3	chrX	+	16335104	16335277	16335104	16335472	36	33	69	35	34	14	67	2	0.0802102	0.0554731	3.79298e-10		0.521739	0.663462	0.708333	0.971014
set-2	chrIII	-	4925747	4926496	4925738	4926496	249	93	294	165	192	139	169	172	0.00936373	6.76242e-05	4.62564e-10		0.72807	0.640523	0.58006	0.495601
F53C11.5	chrV	+	13787616	13791016	13790160	13791016	389	126	363	198	288	152	211	169	0.000113382	0.00076967	4.9091e-10		0.75534	0.647059	0.654545	0.555263
mlp-1	chrIII	-	5971781	5972582	5971781	5972896	487	334	591	429	118	285	278	370	0.568073	2.42314e-23	4.97319e-10		0.593179	0.579412	0.292804	0.429012
adr-1	chrI	+	7775153	7775201	7775153	7775195	184	164	300	181	254	133	305	103	0.00669847	0.000526501	4.97897e-10		0.528736	0.623701	0.656331	0.747549
C18C4.5	chrV	-	5550881	5551772	5550881	5551610	195	421	92	731	211	355	150	700	1.0326e-21	0.0432676	5.66233e-10		0.316558	0.111786	0.372792	0.176471
F10G8.8	chrI	-	10051605	10051995	10051605	10052204	190	31	331	118	153	134	289	165	0.000349459	1.60593e-15	5.69716e-10		0.859729	0.737194	0.533101	0.636564
C49H3.6	chrIV	+	7904384	7904431	7904384	7904438	180	202	186	284	117	161	72	227	0.0309546	0.205788	5.86481e-10		0.471204	0.395745	0.420863	0.240803
irk-2	chrX	-	704098	704315	704098	704324	23	28	10	63	5	35	1	71	0.000157606	0.00115515	6.86417e-10		0.45098	0.136986	0.125	0.0138889
R11A8.7	chrIV	+	10381579	10381658	10381579	10381652	172	127	281	130	182	67	274	68	0.00342062	0.00016142	7.24446e-10		0.575251	0.683698	0.730924	0.80117
lev-10	chrI	+	14399537	14399622	14398858	14399622	17	216	28	226	48	156	72	180	0.162688	2.90926e-06	8.40829e-10		0.0729614	0.110236	0.235294	0.285714
Y39E4B.10	chrIII	-	13147582	13150186	13147576	13150186	143	125	143	149	79	143	53	154	0.310894	8.87467e-05	8.50704e-10		0.533582	0.489726	0.355856	0.256039
scrm-1	chrI	-	11689114	11689344	11688989	11689344	60	68	149	122	141	18	143	34	0.134437	9.1723e-15	9.11919e-10		0.46875	0.549815	0.886792	0.80791
tom-1	chrI	+	5557783	5559328	5557972	5559328	96	36	191	43	161	11	216	10	0.063467	7.56197e-07	1.1056e-09		0.727273	0.816239	0.936047	0.955752
let-765	chrIII	-	6598005	6598140	6597993	6598140	93	214	91	289	36	216	29	253	0.0688685	7.82769e-06	1.2027e-09		0.302932	0.239474	0.142857	0.102837
gar-2	chrIII	+	6319457	6319567	6319457	6320318	20	26	14	63	2	79	1	78	0.00343221	7.56126e-09	1.25768e-09		0.434783	0.181818	0.0246914	0.0126582
glr-4	chrII	-	7785507	7786390	7785507	7786598	53	8	56	16	60	23	46	68	0.257681	0.0411423	1.31043e-09		0.868852	0.777778	0.722892	0.403509
lfi-1	chrX	+	4984206	4992625	4984206	4984774	0	50	0	33	19	34	32	39	1	6.08384e-07	1.33439e-09		0	0	0.358491	0.450704
C54G10.4	chrV	-	14654805	14654902	14654451	14654902	22	102	34	151	20	18	37	20	1	7.83577e-05	1.35266e-09		0.177419	0.183784	0.526316	0.649123
spv-1	chrII	-	7912964	7913997	7912964	7913174	69	93	36	219	54	122	47	244	1.67785e-10	0.0241934	1.46705e-09		0.425926	0.141176	0.306818	0.161512
rdy-2	chrV	-	13598726	13598893	13598726	13599068	54	24	107	15	49	11	121	2	0.00177524	0.115989	1.75814e-09		0.692308	0.877049	0.816667	0.98374
T01G9.2	chrI	-	8287996	8288048	8288005	8288048	190	89	353	124	190	62	283	38	0.0937343	0.0676159	2.0745e-09		0.681004	0.740042	0.753968	0.88162
cyh-1	chrII	+	3507610	3508469	3507610	3508475	157	140	196	201	78	149	80	202	0.398691	2.96378e-05	2.64767e-09		0.52862	0.493703	0.343612	0.283688
grsp-2	chrIV	+	8817994	8818305	8817994	8818117	14	49	54	30	56	23	32	7	4.03439e-07	6.41074e-09	3.00599e-09		0.222222	0.642857	0.708861	0.820513
lin-9	chrIII	-	8903613	8903658	8903619	8903658	116	155	181	164	139	114	134	56	0.0186007	0.00666355	3.44872e-09		0.428044	0.524638	0.549407	0.705263
fln-2	chrX	+	9416489	9416754	9416489	9416923	241	22	273	33	129	55	175	69	0.39365	4.44174e-09	3.82701e-09		0.91635	0.892157	0.701087	0.717213
itr-1	chrIV	+	7690987	7691378	7691166	7691378	27	21	30	34	0	38	2	49	0.346164	1.77977e-09	4.41661e-09		0.5625	0.46875	0	0.0392157
eri-9	chrIII	+	4933321	4933381	4933321	4933375	154	151	233	232	197	106	241	88	0.941324	0.000305893	4.761e-09		0.504918	0.501075	0.650165	0.732523
glr-4	chrII	-	7785507	7786598	7786433	7786598	8	49	16	63	23	51	68	45	0.373399	0.024403	5.0489e-09		0.140351	0.202532	0.310811	0.60177
rgs-7	chrX	+	3552927	3556439	3556339	3556439	118	171	138	127	115	72	142	69	0.00832351	1.46352e-05	5.46126e-09		0.408304	0.520755	0.614973	0.672986
let-413	chrV	-	7975065	7975432	7975065	7975411	240	87	297	221	149	131	204	186	2.46732e-06	3.1472e-07	6.28165e-09		0.733945	0.573359	0.532143	0.523077
F28C6.4	chrII	-	8598870	8599029	8598865	8599029	115	155	118	164	57	153	34	161	0.863583	0.000538572	6.8635e-09		0.425926	0.41844	0.271429	0.174359
egl-8	chrV	+	26381	28381	26381	29335	105	113	141	169	295	80	269	104	0.595086	4.20905e-14	7.6398e-09		0.481651	0.454839	0.786667	0.72118
zen-4	chrIV	+	6118962	6119009	6118962	6119003	123	283	200	374	153	243	186	180	0.147552	0.0141817	8.35999e-09		0.302956	0.348432	0.386364	0.508197
B0303.11	chrIII	-	8707315	8707409	8706981	8707409	21	58	87	86	4	186	3	157	0.000557483	3.66847e-09	8.91238e-09		0.265823	0.50289	0.0210526	0.01875
F56C11.5	chrI	+	178621	180599	180466	180599	76	334	193	414	184	254	151	264	2.28276e-06	9.74235e-14	1.02447e-08		0.185366	0.317957	0.420091	0.363855
cdh-5	chrIV	+	8675632	8675740	8675632	8676169	98	12	157	25	111	72	98	71	0.586925	6.80067e-08	1.04774e-08		0.890909	0.862637	0.606557	0.579882
unc-11	chrI	-	3800971	3803010	3800280	3803010	17	144	34	111	38	110	41	58	0.00329116	0.000580132	1.28153e-08		0.10559	0.234483	0.256757	0.414141
mpz-1	chrII	-	10752433	10753530	10752433	10754010	39	54	61	60	48	10	87	20	0.268902	6.40929e-07	1.34517e-08		0.419355	0.504132	0.827586	0.813084
scrm-1	chrI	-	11688989	11689344	11688989	11689034	68	49	122	98	18	98	34	112	0.646603	1.09315e-11	1.38381e-08		0.581197	0.554545	0.155172	0.232877
bre-1	chrIV	+	8988060	8988769	8987302	8988769	29	198	74	228	101	123	81	147	0.000825738	2.09967e-14	1.4727e-08		0.127753	0.245033	0.450893	0.355263
arid-1	chrV	+	197344	198916	197344	198925	169	178	222	261	90	184	73	202	0.439102	8.11388e-05	1.61163e-08		0.487032	0.459627	0.328467	0.265455
F10G8.8	chrI	-	10052024	10052204	10051605	10052204	181	31	322	118	161	134	305	165	0.000469319	6.91983e-14	1.83539e-08		0.853774	0.731818	0.545763	0.648936
clr-1	chrII	+	5466548	5466594	5466548	5466600	147	105	172	198	118	139	101	193	0.00422796	0.00592587	2.00818e-08		0.583333	0.464865	0.459144	0.343537
Y73E7A.3	chrI	+	1586340	1588636	1588452	1588636	54	76	60	85	59	37	89	27	1	0.00459687	2.07925e-08		0.415385	0.413793	0.614583	0.767241
lid-1	chrI	-	10192114	10192170	10192129	10192170	195	241	267	348	182	150	225	122	0.705195	0.00571169	2.50499e-08		0.447248	0.434146	0.548193	0.648415
Y64G10A.7	chrIV	+	14310033	14311584	14309514	14311584	23	16	43	19	48	0	76	1	0.293549	3.18371e-07	2.89068e-08		0.589744	0.693548	1	0.987013
T23E7.2	chrX	+	17678755	17678929	17677245	17678929	9	533	42	91	18	331	22	156	4.61745e-24	0.00433074	3.64609e-08		0.0166052	0.315789	0.0515759	0.123596
tom-1	chrI	+	5552742	5552879	5552742	5554740	69	120	195	68	78	92	150	86	1.01517e-15	0.0854146	3.78133e-08		0.365079	0.741445	0.458824	0.635593
trpp-8	chrI	-	5614691	5614734	5614685	5614734	96	138	114	234	69	162	43	198	0.0434185	0.0152675	3.81018e-08		0.410256	0.327586	0.298701	0.178423
let-765	chrIII	-	6598601	6598725	6598610	6598725	191	102	230	90	187	54	197	32	0.0814707	0.00216079	3.96662e-08		0.651877	0.71875	0.775934	0.860262
Y39G10AR.7	chrI	+	2316390	2316439	2316390	2316445	193	98	250	113	139	84	88	124	0.501652	0.353798	4.15315e-08		0.66323	0.688705	0.623318	0.415094
mpz-1	chrII	-	10753588	10754010	10752433	10754010	52	54	66	60	68	10	100	20	0.692679	5.59665e-08	4.50646e-08		0.490566	0.52381	0.871795	0.833333
F53C3.13	chrII	-	3923157	3924460	3920953	3924460	82	110	119	149	63	30	119	48	0.775026	8.4349e-05	5.05375e-08		0.427083	0.44403	0.677419	0.712575
W05F2.4	chrI	-	3399021	3399465	3399021	3399600	105	62	196	45	136	52	255	44	5.43867e-05	0.0683429	7.28471e-08		0.628743	0.813278	0.723404	0.852843
twk-39	chrIII	+	11801775	11802994	11802937	11802994	22	10	43	15	21	19	5	44	0.627959	0.227192	7.75526e-08		0.6875	0.741379	0.525	0.102041
mlt-11	chrV	+	20667643	20667715	20667643	20668172	22	18	107	124	123	357	72	386	0.391533	0.000174568	8.48578e-08		0.55	0.463203	0.25625	0.157205
cdh-5	chrIV	+	8675779	8676169	8675632	8676169	84	12	129	25	97	72	92	71	0.468012	2.4078e-07	1.08214e-07		0.875	0.837662	0.573964	0.564417
met-1	chrI	+	4256881	4257701	4256881	4256971	24	167	39	266	22	152	70	129	1	1	1.42803e-07		0.125654	0.127869	0.126437	0.351759
let-805	chrIII	+	2665026	2665115	2665026	2665501	57	79	45	154	54	121	40	202	0.000264456	0.056049	1.61975e-07		0.419118	0.226131	0.308571	0.165289
unc-53	chrII	-	11061736	11061841	11061148	11061841	99	38	133	63	119	7	194	14	0.399653	1.08354e-06	1.62019e-07		0.722628	0.678571	0.944444	0.932692
npp-3	chrII	-	11873609	11873753	11873600	11873753	199	111	266	146	130	179	145	189	0.93751	3.92528e-08	1.64682e-07		0.641935	0.645631	0.420712	0.434132
cdk-12	chrIII	+	4333590	4334125	4333590	4334119	121	188	173	176	142	129	153	96	0.00765191	0.0015041	1.87532e-07		0.391586	0.495702	0.523985	0.614458
rbf-1	chrIII	+	6699131	6699243	6698911	6699243	18	47	40	53	47	21	68	30	0.0648637	2.19885e-06	2.06577e-07		0.276923	0.430108	0.691176	0.693878
pqn-22	chrIV	-	6023852	6024449	6023586	6024449	509	140	19	76	279	49	21	28	1.17013e-28	0.0129709	2.48209e-07		0.784284	0.2	0.85061	0.428571
inx-18	chrIV	+	613103	613719	613072	613719	5	100	24	85	10	42	37	83	0.00023022	0.00725779	2.59101e-07		0.047619	0.220183	0.192308	0.308333
unc-31	chrIV	+	12783827	12784684	12784075	12784684	58	20	63	28	51	9	113	2	0.497244	0.145009	2.77365e-07		0.74359	0.692308	0.85	0.982609
trr-1	chrII	-	11661983	11662032	11661974	11662032	110	100	169	209	77	156	85	204	0.0847611	4.97376e-05	2.81109e-07		0.52381	0.44709	0.330472	0.294118
suox-1	chrX	+	15498631	15498730	15498631	15498947	1	88	2	108	25	21	12	21	1	1.34961e-13	2.92734e-07		0.011236	0.0181818	0.543478	0.363636
T08A11.1	chrIII	-	4253931	4257710	4253925	4257710	118	55	107	81	64	87	69	102	0.0299153	3.78707e-06	3.05709e-07		0.682081	0.569149	0.423841	0.403509
ddx-19	chrII	+	8886789	8887036	8885389	8887036	9	130	11	138	22	68	24	44	0.819694	0.000247004	3.36328e-07		0.0647482	0.0738255	0.244444	0.352941
B0303.11	chrIII	-	8706981	8707260	8706981	8707409	12	58	87	86	2	186	0	157	1.37782e-06	4.22859e-06	3.65916e-07		0.171429	0.50289	0.0106383	0
fln-2	chrX	+	9416848	9416923	9416489	9416923	217	22	277	33	120	55	189	69	0.667601	1.73549e-08	4.00789e-07		0.90795	0.893548	0.685714	0.732558
Y43F8B.3	chrV	+	19505254	19506370	19506060	19506370	23	23	33	43	2	117	11	92	0.574449	2.26189e-13	4.18804e-07		0.5	0.434211	0.0168067	0.106796
Y40B1A.3	chrI	+	13353246	13354068	13353246	13354059	122	128	195	136	157	88	189	79	0.0184049	0.000781489	4.78364e-07		0.488	0.589124	0.640816	0.705224
frpr-17	chrX	+	14409473	14410963	14409438	14410963	19	35	65	21	16	16	36	6	2.98986e-06	0.256113	4.97724e-07		0.351852	0.755814	0.5	0.857143
gar-2	chrIII	+	6319607	6320318	6319457	6320318	23	26	26	63	3	79	7	78	0.0426176	2.77068e-09	5.50308e-07		0.469388	0.292135	0.0365854	0.0823529
met-1	chrI	+	4257107	4257701	4256881	4257701	172	24	301	39	169	22	141	70	0.782374	0.875904	5.52501e-07		0.877551	0.885294	0.884817	0.668246
dur-1	chrIV	-	9924759	9927574	9927379	9927574	44	27	107	4	37	20	101	8	2.00066e-09	0.853844	5.84936e-07		0.619718	0.963964	0.649123	0.926606
sdc-1	chrX	+	16276920	16276960	16276920	16276966	15	16	18	40	4	28	0	37	0.114925	0.00251441	6.77436e-07		0.483871	0.310345	0.125	0
C32C4.1	chrV	+	10644666	10644969	10644666	10644771	35	15	58	16	36	1	67	0	0.299818	0.00140135	7.12826e-07		0.7	0.783784	0.972973	1
C32C4.1	chrV	+	10644666	10644969	10644799	10644969	35	15	58	10	36	1	67	0	0.0670285	0.00140135	7.12826e-07		0.7	0.852941	0.972973	1
F37D6.2	chrI	-	10476736	10476778	10476730	10476778	231	92	373	166	163	87	107	105	0.49002	0.122287	1.07696e-06		0.71517	0.692022	0.652	0.504717
F53C3.13	chrII	-	3924124	3924460	3920953	3924460	34	110	62	149	24	30	56	48	0.273518	0.0052329	1.27645e-06		0.236111	0.293839	0.444444	0.538462
M01A8.2	chrIII	-	9266199	9267823	9267620	9267823	134	36	137	59	92	43	102	85	0.0564398	0.036355	1.30868e-06		0.788235	0.69898	0.681481	0.545455
hlb-1	chrX	-	13867297	13867905	13867297	13868031	177	105	172	233	142	130	148	194	1.86691e-07	0.0127663	1.3152e-06		0.62766	0.424691	0.522059	0.432749
Y52B11A.2	chrI	-	10968721	10968772	10968727	10968772	94	175	139	259	80	117	136	105	1	0.244726	1.37846e-06		0.349442	0.349246	0.406091	0.564315
gcy-28	chrI	+	4500923	4502563	4500923	4501783	154	177	196	281	139	50	145	70	0.130051	1.81234e-09	1.85141e-06		0.465257	0.410901	0.73545	0.674419
cpb-1	chrIII	+	9323137	9323176	9323137	9323183	146	183	177	350	76	272	132	342	0.00181362	4.00112e-10	1.86358e-06		0.443769	0.335863	0.218391	0.278481
unc-62	chrV	+	4499808	4501218	4497590	4501218	42	227	75	246	94	164	102	211	0.0223656	5.60049e-08	2.05941e-06		0.156134	0.233645	0.364341	0.325879
grsp-2	chrIV	+	8816403	8816637	8816403	8817084	137	26	348	16	138	143	266	143	1.69339e-05	5.83492e-14	4.22978e-06		0.840491	0.956044	0.491103	0.650367
cdk-12	chrIII	+	4334324	4336226	4334324	4336220	77	201	125	227	102	96	115	129	0.0393366	1.83502e-07	5.10556e-06		0.276978	0.355114	0.515152	0.471311
zyg-12	chrII	+	4952532	4953160	4952532	4952839	27	36	7	137	22	58	15	106	1.08083e-10	0.0755606	6.05256e-06		0.428571	0.0486111	0.275	0.123967
nid-1	chrV	+	12914136	12914440	12914392	12914440	36	57	73	91	30	210	37	203	0.430877	4.05478e-07	1.25202e-05		0.387097	0.445122	0.125	0.154167
dur-1	chrIV	-	9925789	9925943	9925789	9927309	48	19	95	1	58	12	95	4	1.11182e-07	0.153006	1.32593e-05		0.716418	0.989583	0.828571	0.959596
kvs-5	chrIV	+	748739	748812	738124	748812	96	39	281	47	311	29	414	58	0.00055329	6.30475e-08	1.38136e-05		0.711111	0.856707	0.914706	0.877119
frm-4	chrI	-	5403966	5404235	5403966	5404520	64	305	79	258	66	71	63	124	0.0490342	1.0717e-11	2.63463e-05		0.173442	0.234421	0.481752	0.336898
F21A10.2	chrX	-	10187959	10188298	10187959	10194289	45	113	121	145	121	91	135	140	0.000659579	5.69025e-08	3.07535e-05		0.28481	0.454887	0.570755	0.490909
F23H12.3	chrV	+	12346375	12348329	12348277	12348329	102	112	61	126	14	73	39	110	0.00229589	2.26359e-07	4.7083e-05		0.476636	0.326203	0.16092	0.261745
unc-52	chrII	-	14657492	14658474	14657920	14658474	176	247	58	307	138	134	62	176	1.38144e-15	0.0193054	6.92962e-05		0.416076	0.158904	0.507353	0.260504
Y43F8B.3	chrV	+	19504105	19506370	19504105	19505894	194	30	191	38	61	86	152	61	0.359573	5.5849e-20	9.38153e-05		0.866071	0.834061	0.414966	0.713615
denn-4	chrIV	+	1938200	1939090	1938200	1939096	84	87	90	131	38	133	52	129	0.102047	3.00199e-07	0.00011924		0.491228	0.40724	0.222222	0.287293
nid-1	chrV	+	12914136	12914440	12914136	12914220	36	41	73	56	30	153	37	133	0.195231	7.70823e-07	0.000139388		0.467532	0.565891	0.163934	0.217647
lgx-1	chrX	-	5528214	5529269	5529097	5529269	113	169	118	304	33	299	124	341	0.00103018	1.27902e-18	0.000184433		0.400709	0.279621	0.0993976	0.266667
egl-8	chrV	+	38270	40453	39027	40453	343	232	437	234	194	346	345	354	0.0525862	1.97194e-15	0.000297022		0.596522	0.651267	0.359259	0.493562
Y71H2AM.15	chrIII	-	2752006	2752268	2752006	2755199	93	74	112	62	122	27	136	47	0.121419	5.93757e-07	0.000307381		0.556886	0.643678	0.818792	0.743169
lgx-1	chrX	-	5535872	5536498	5536417	5536498	130	123	134	174	67	185	107	190	0.0741909	1.28097e-08	0.000387379		0.513834	0.435065	0.265873	0.360269
avr-14	chrI	-	5970194	5970302	5969004	5970302	13	74	31	54	46	44	34	55	0.00154858	2.69763e-07	0.000598636		0.149425	0.364706	0.511111	0.382022
egl-8	chrV	+	38270	38990	38270	40453	220	343	223	437	323	194	320	345	0.0564318	1.36393e-14	0.00151642		0.390764	0.337879	0.624758	0.481203
uig-1	chrV	-	13275686	13275876	13275397	13275876	85	232	203	222	120	168	137	222	6.27076e-09	0.000148618	0.00182378		0.268139	0.477647	0.416667	0.381616
let-653	chrIV	+	11889174	11889556	11888817	11889556	35	12	171	33	107	209	206	169	0.14238	2.27688e-07	0.0120315		0.744681	0.838235	0.338608	0.549333
F55A4.8	chrX	-	1041847	1044545	1041847	1042946	142	64	181	49	155	18	135	33	0.021786	7.86715e-07	0.0129278		0.68932	0.786957	0.895954	0.803571
F33A8.6	chrII	+	11057740	11057896	11055874	11057896	66	106	56	133	8	124	45	130	0.0946744	9.25688e-12	0.0154554		0.383721	0.296296	0.0606061	0.257143
F25B5.3	chrIII	+	5950339	5952040	5951549	5952040	30	25	20	22	31	0	26	6	0.542895	1.10364e-06	0.0194231		0.545455	0.47619	1	0.8125
ifa-1	chrX	+	11271321	11273269	11272906	11273269	96	110	111	140	107	33	102	81	0.63742	2.35219e-08	0.0841421		0.466019	0.442231	0.764286	0.557377
unc-13	chrI	+	7443946	7444031	7435227	7444031	16	108	86	137	16	143	34	139	3.18835e-07	0.457077	0.156929		0.129032	0.38565	0.100629	0.196532
ZC434.9	chrI	+	10358496	10359423	10359136	10359423	226	9	113	130	58	0	43	3	4.04368e-37	0.212922	0.422353		0.961702	0.465021	1	0.934783
ZC21.3	chrIII	+	8525470	8525544	8525470	8527841	137	27	165	46	51	45	122	29	0.236752	2.92726e-07	0.557362		0.835366	0.781991	0.53125	0.807947
