# Supplementary material for: CRISPR-mediated genetic interaction profiling identifies RNA binding proteins controlling metazoan fitness
Source: eLife journal article supplement (doi:10.7554/elife.28129), 2017-07-18
Supplement: supp [file elife-28129-supp-v1.zip › elife_poa_e28129_Supplementary_File_5.xlsx]

## Sheet: Transcript Abundance GO Terms
Enriched GO terms for genes with steady state RNA differences (wt vs mutant)
exc-7 regulated genes								mbl-1 regulated genes								exc-7; mbl-1 regulated genes
	Caenorhabditis elegans (REF)								Caenorhabditis elegans (REF)								Caenorhabditis elegans (REF)
GO biological process complete	#	#	expected	Fold Enrichment	+/-	P value		GO biological process complete	#	#	expected	Fold Enrichment	+/-	P value		GO biological process complete	#	#	expected	Fold Enrichment	+/-	P value
Unclassified	9316	15	10.02	1.5	+	0		Unclassified	9316	1	0.91	1.1	+	0		Unclassified	9316	67	44.64	1.5	+	0
																cellular process	7029	11	33.68	0.33	-	0.000315
																regulation of cellular process	3568	3	17.1	< 0.2	-	0.0258
																regulation of biological process	4232	4	20.28	< 0.2	-	0.00599
																biological regulation	4914	6	23.55	0.25	-	0.00589

## Sheet: Alternative Splicing GO Terms
Enriched GO terms for genes junction differences (wt vs mutant)
Genes with exc-7 regulated junctions								Genes with mbl-1 regulated junctions								Genes with junctions differentially utilized in exc-7; mbl-1 double mutant
	Caenorhabditis elegans (REF)								Caenorhabditis elegans (REF)								Caenorhabditis elegans (REF)
GO biological process complete	#	#	expected	Fold Enrichment	+/-	P value		GO biological process complete	#	#	expected	Fold Enrichment	+/-	P value		GO biological process complete	#	#	expected	Fold Enrichment	+/-	P value
extracellular matrix organization	13	3	0.03	> 100	+	0.00693		regulation of pharyngeal pumping	39	5	0.2	24.97	+	0.00463		protein localization to synapse	18	4	0.16	25.25	+	0.05
extracellular structure organization	14	3	0.03	> 100	+	0.00864		regulation of eating behavior	48	5	0.25	20.29	+	0.0126		macromolecule localization	1171	27	10.31	2.62	+	0.0106
cellular component organization	1768	18	3.72	4.84	+	1.17e-05		regulation of feeding behavior	51	5	0.26	19.1	+	0.0169		localization	3112	70	27.39	2.56	+	2.44e-11
cellular component organization or biogenesis	1901	18	4	4.5	+	3.66e-05		regulation of biological process	4232	45	21.73	2.07	+	0.000538		cell junction organization	27	5	0.24	21.04	+	0.011
neuron projection development	248	6	0.52	11.51	+	0.0294		biological regulation	4914	52	25.23	2.06	+	3e-05		cellular component organization	1768	49	15.56	3.15	+	6.58e-10
anatomical structure morphogenesis	1123	11	2.36	4.66	+	0.0339		regulation of anatomical structure size	101	6	0.52	11.57	+	0.0343		cellular process	7029	103	61.86	1.66	+	6.99e-07
Unclassified	9316	8	19.59	0.41	-	0		regulation of biological quality	1277	20	6.56	3.05	+	0.0162		cellular component organization or biogenesis	1901	49	16.73	2.93	+	9.27e-09
								chemical synaptic transmission	174	9	0.89	10.07	+	0.00075		single-organism cellular process	3750	81	33	2.45	+	4.7e-13
								anterograde trans-synaptic signaling	174	9	0.89	10.07	+	0.00075		single-organism process	8032	118	70.69	1.67	+	2.14e-09
								trans-synaptic signaling	174	9	0.89	10.07	+	0.00075		regulated exocytosis	34	5	0.3	16.71	+	0.0331
								synaptic signaling	174	9	0.89	10.07	+	0.00075		single-organism transport	813	22	7.16	3.07	+	0.00753
								cell-cell signaling	246	11	1.26	8.71	+	0.00015		single-organism localization	855	22	7.52	2.92	+	0.0166
								single-organism cellular process	3750	48	19.25	2.49	+	2.72e-07		transport	2305	55	20.29	2.71	+	6.04e-09
								single-organism process	8032	71	41.24	1.72	+	8.96e-06		establishment of localization	2394	57	21.07	2.71	+	2.23e-09
								cellular process	7029	59	36.09	1.63	+	0.00864		vesicle-mediated transport	1029	32	9.06	3.53	+	1.19e-06
								embryonic morphogenesis	166	8	0.85	9.39	+	0.00582		regulation of eating behavior	48	6	0.42	14.2	+	0.0114
								single-organism developmental process	4809	52	24.69	2.11	+	1.38e-05		regulation of feeding behavior	51	6	0.45	13.37	+	0.0161
								developmental process	4849	52	24.89	2.09	+	1.86e-05		regulation of biological process	4232	85	37.25	2.28	+	4.09e-12
								embryo development	3092	34	15.87	2.14	+	0.0166		biological regulation	4914	97	43.25	2.24	+	1.69e-14
								multicellular organism development	4542	51	23.32	2.19	+	5.76e-06		establishment of vesicle localization	52	6	0.46	13.11	+	0.0179
								anatomical structure development	4756	52	24.42	2.13	+	9.22e-06		vesicle localization	53	6	0.47	12.86	+	0.0199
								single-multicellular organism process	4651	52	23.88	2.18	+	4.06e-06		organelle localization	200	11	1.76	6.25	+	0.00453
								multicellular organismal process	5553	54	28.51	1.89	+	0.000261		establishment of organelle localization	183	10	1.61	6.21	+	0.0141
								anatomical structure morphogenesis	1123	22	5.77	3.82	+	0.000118		positive regulation of locomotion	89	9	0.78	11.49	+	0.000285
								regulation of locomotion	223	9	1.14	7.86	+	0.00569		positive regulation of biological process	1114	36	9.8	3.67	+	2.78e-08
								reproductive behavior	386	12	1.98	6.06	+	0.00175		regulation of locomotion	223	15	1.96	7.64	+	4.27e-06
								behavior	857	18	4.4	4.09	+	0.000852		negative regulation of vulval development	211	14	1.86	7.54	+	1.78e-05
								reproduction	2872	33	14.74	2.24	+	0.00934		regulation of vulval development	266	17	2.34	7.26	+	7.35e-07
								regulation of multicellular organismal development	422	13	2.17	6	+	0.000651		regulation of nematode larval development	310	18	2.73	6.6	+	9.82e-07
								regulation of multicellular organismal process	847	20	4.35	4.6	+	2.57e-05		regulation of post-embryonic development	310	18	2.73	6.6	+	9.82e-07
								regulation of developmental process	885	18	4.54	3.96	+	0.00135		regulation of multicellular organismal development	422	23	3.71	6.19	+	1.11e-08
								positive regulation of multicellular organism growth	346	10	1.78	5.63	+	0.0286		regulation of multicellular organismal process	847	33	7.45	4.43	+	1.7e-09
								positive regulation of multicellular organismal process	503	12	2.58	4.65	+	0.0256		regulation of developmental process	885	34	7.79	4.37	+	1.06e-09
								positive regulation of biological process	1114	21	5.72	3.67	+	0.000474		negative regulation of nematode larval development	224	15	1.97	7.61	+	4.53e-06
								positive regulation of developmental growth	356	10	1.83	5.47	+	0.0365		negative regulation of post-embryonic development	224	15	1.97	7.61	+	4.53e-06
								positive regulation of developmental process	481	12	2.47	4.86	+	0.0164		negative regulation of developmental process	273	15	2.4	6.24	+	6.07e-05
								locomotion	1666	38	8.55	4.44	+	2.07e-12		negative regulation of biological process	1012	30	8.91	3.37	+	1.32e-05
								body morphogenesis	631	14	3.24	4.32	+	0.0103		negative regulation of multicellular organismal process	277	15	2.44	6.15	+	7.33e-05
								cell development	879	16	4.51	3.55	+	0.0246		embryonic morphogenesis	166	10	1.46	6.84	+	0.00603
								cell differentiation	1133	19	5.82	3.27	+	0.0108		single-organism developmental process	4809	85	42.32	2.01	+	7.37e-09
								cellular developmental process	1147	19	5.89	3.23	+	0.0129		developmental process	4849	85	42.68	1.99	+	1.18e-08
								negative regulation of biological process	1012	18	5.2	3.46	+	0.00892		embryo development	3092	54	27.21	1.98	+	0.000723
								vesicle-mediated transport	1029	18	5.28	3.41	+	0.0112		multicellular organism development	4542	83	39.97	2.08	+	2.66e-09
								transport	2305	31	11.83	2.62	+	0.000729		anatomical structure development	4756	85	41.86	2.03	+	3.93e-09
								establishment of localization	2394	32	12.29	2.6	+	0.000502		single-multicellular organism process	4651	85	40.93	2.08	+	1.1e-09
								localization	3112	39	15.98	2.44	+	7.33e-05		multicellular organismal process	5553	88	48.87	1.8	+	1.03e-06
								animal organ development	1115	18	5.72	3.14	+	0.0332		anatomical structure morphogenesis	1123	36	9.88	3.64	+	3.48e-08
								system development	1452	25	7.45	3.35	+	0.000149		chemical synaptic transmission	174	10	1.53	6.53	+	0.00909
								cellular component organization	1768	27	9.08	2.97	+	0.000448		anterograde trans-synaptic signaling	174	10	1.53	6.53	+	0.00909
								cellular component organization or biogenesis	1901	27	9.76	2.77	+	0.00187		trans-synaptic signaling	174	10	1.53	6.53	+	0.00909
								developmental process involved in reproduction	1332	20	6.84	2.92	+	0.0299		synaptic signaling	174	10	1.53	6.53	+	0.00909
								Unclassified	9316	18	47.83	0.38	-	0		cell-cell signaling	246	13	2.17	6	+	0.000816
																oviposition	346	19	3.05	6.24	+	7.86e-07
																reproductive behavior	386	22	3.4	6.48	+	1.43e-08
																behavior	857	27	7.54	3.58	+	2.43e-05
																multicellular organismal reproductive process	913	29	8.04	3.61	+	5.38e-06
																multicellular organism reproduction	932	29	8.2	3.54	+	8.5e-06
																reproduction	2872	65	25.28	2.57	+	2.75e-10
																reproductive process	1823	48	16.04	2.99	+	7.77e-09
																actin filament-based process	230	12	2.02	5.93	+	0.00265
																cell migration	298	15	2.62	5.72	+	0.000187
																cell motility	303	15	2.67	5.62	+	0.000231
																locomotion	1666	60	14.66	4.09	+	1.65e-18
																movement of cell or subcellular component	445	19	3.92	4.85	+	4.44e-05
																localization of cell	303	15	2.67	5.62	+	0.000231
																molting cycle, collagen and cuticulin-based cuticle	320	14	2.82	4.97	+	0.00265
																molting cycle	337	14	2.97	4.72	+	0.00481
																generation of neurons	347	14	3.05	4.58	+	0.00672
																neurogenesis	356	14	3.13	4.47	+	0.00898
																nervous system development	400	17	3.52	4.83	+	0.000274
																system development	1452	47	12.78	3.68	+	8.37e-12
																cell differentiation	1133	37	9.97	3.71	+	1.01e-08
																cellular developmental process	1147	37	10.09	3.67	+	1.44e-08
																body morphogenesis	631	25	5.55	4.5	+	9.85e-07
																positive regulation of multicellular organism growth	346	13	3.05	4.27	+	0.0322
																positive regulation of multicellular organismal process	503	16	4.43	3.61	+	0.0258
																positive regulation of developmental growth	356	13	3.13	4.15	+	0.0433
																positive regulation of growth	375	15	3.3	4.54	+	0.00327
																regulation of growth	433	15	3.81	3.94	+	0.0182
																positive regulation of developmental process	481	17	4.23	4.02	+	0.00341
																regulation of localization	376	14	3.31	4.23	+	0.0166
																cytoskeleton organization	416	15	3.66	4.1	+	0.0114
																organelle organization	1197	27	10.53	2.56	+	0.0158
																hermaphrodite genitalia development	736	23	6.48	3.55	+	0.000381
																genitalia development	747	23	6.57	3.5	+	0.000494
																single organism reproductive process	1502	39	13.22	2.95	+	2.01e-06
																animal organ development	1115	36	9.81	3.67	+	2.85e-08
																reproductive structure development	983	29	8.65	3.35	+	2.73e-05
																reproductive system development	983	29	8.65	3.35	+	2.73e-05
																developmental process involved in reproduction	1332	37	11.72	3.16	+	9.63e-07
																sex differentiation	1051	30	9.25	3.24	+	3.09e-05
																gonad development	968	29	8.52	3.4	+	1.96e-05
																development of primary sexual characteristics	968	29	8.52	3.4	+	1.96e-05
																regulation of cellular component organization	527	16	4.64	3.45	+	0.0453
																regulation of cellular process	3568	63	31.4	2.01	+	2.81e-05
																receptor-mediated endocytosis	724	21	6.37	3.3	+	0.00441
																endocytosis	850	26	7.48	3.48	+	8.39e-05
																negative regulation of cellular process	590	17	5.19	3.27	+	0.0479
																cell development	879	25	7.74	3.23	+	0.000613
																positive regulation of cellular process	645	18	5.68	3.17	+	0.0414
																regulation of biological quality	1277	30	11.24	2.67	+	0.00199
																nematode larval development	2071	45	18.23	2.47	+	2e-05
																larval development	2075	45	18.26	2.46	+	2.12e-05
																post-embryonic development	2095	46	18.44	2.49	+	9.35e-06
																embryo development ending in birth or egg hatching	3024	51	26.61	1.92	+	0.00502
																Unclassified	9316	36	81.99	0.44	-	0
