# Supplementary material for: CRISPR-mediated genetic interaction profiling identifies RNA binding proteins controlling metazoan fitness
Source: eLife journal article supplement (doi:10.7554/elife.28129), 2017-07-18
Supplement: supp [file elife-28129-supp-v1.zip › elife_poa_e28129_Supplementary_File_6.xlsx]

## Sheet: Sheet1
Single mutant trains generated	Deletion Coordinates	Marker	sgRNA target Sequence (20mer)
unc-75(csb20)	chrI:11,594,258-11,600,371	myo-2::GFP	TTATGGTCAGATGAAGTAGG
fust-1(csb21)	chrII:7,153,325-7,155,276	myo-2::GFP	GGATATGATGGTGGACGTGG
mec-8(csb22)	chrI:9,442,166-9,444,301	myo-2::GFP	AAGAGTGGAGCACGCAGAGG
mec-8(csb23)	chrI:9,442,166-9,444,301	myo-3::GFP	AAGAGTGGAGCACGCAGAGG
msi-1(csb24)	chrIII:3,965,801-3,971,874	myo-2::GFP	TCCGGTCTGAGTACTCCAGG
msi-1(csb25)	chrIII:3,965,801-3,971,874	myo-2::BFP	TCCGGTCTGAGTACTCCAGG
hrpf-1(csb26)	chrI:6,753,570-6,756,153	myo-2::GFP	ATG TCG TGG ATT ACC ATG GG
hrpf-1(csb27)	chrI:6,753,570-6,756,153	myo-3::GFP	ATG TCG TGG ATT ACC ATG GG
exc-7(csb28)	chrII:9,576,361-9,580,754	myo-2::GFP	ACGCTGAGAGCAACTGCTGG
exc-7(csb29)	chrX:17,001,655-17,008,392	myo-3::GFP	ACGCTGAGAGCAACTGCTGG
mbl-1(csb30)	chrX:17,006,927-17,008,476 (approximate)	myo-2::GFP	GGA ATG TGT GTC TAG AAT GG
mbl-1(csb31)	chrX:17,006,927-17,008,476 (approximate)	myo-3::GFP	GGA ATG TGT GTC TAG AAT GG
asd-1(csb32)	chrIII:4,197,321-4,202,672	myo-2::GFP	CCA AAT TGG GGA CGG GAT GG
sup-12(csb33)	chrX:3,904,623-3,907,143	myo-2::GFP	GCC GTA TCC TGC TGG ATA GG
sup-12(csb34)	chrX:3,904,623-3,907,143	myo-3::GFP	GCC GTA TCC TGC TGG ATA GG
tiar-3(csb35)	chrX:10,167,136-10,171,546	myo-3::GFP	TCAATCATAAAAAAGAAAGG
Y57G11C.9(csb36)	chrIV:14,787,115-14,790,631	myo-3::GFP	GGATATAACAATCATCGTGG
tdp-1(csb37)	chrII:8,998,137-8,999,057	myo-2::GFP	GCTGTTCAGTGAGTGCTTGG
tdp-1(csb38)	chrII:8,998,137-8,999,057	myo-3::GFP	GCTGTTCAGTGAGTGCTTGG
fox-1(csb39)	chrX:2,445,918-2,450,493 (approximate)	myo-2::GFP	TTGATATGAGGGGAGTGAGG
c25a1.4(csb40)	chrI:10,169,792-10,172,302	myo-2::GFP	GAGT CTA GTT CGC GAG AAA GG
Double mutant strains generated	Additional double mutant versions
unc-75(csb20); fust-1(csb21)
unc-75(csb20); mec-8(csb23)
unc-75(csb20); msi-1(csb24)	unc-75(e950); msi-1(csb24)
unc-75(csb20); fox-1(csb39)
unc-75(csb20); hrpf-1(csb27)
unc-75(csb20); exc-7(csb29)
unc-75(csb20); mbl-1(csb31)
unc-75(e950); asd-1(csb32)
unc-75(csb20); tiar-3(csb35)
unc-75(csb20); Y57G11C.9(csb36)	unc-75(e950); Y57G11C.9(csb36)
unc-75(csb20); tdp-1(csb38)
fust-1(csb21); mec-8(csb23)
fust-1(csb21); msi-1(csb24)	fust-1(csb21); msi-1(csb25)
fust-1(csb21); fox-1(csb39)
fust-1(csb21); hrpf-1(csb27)
fust-1(csb21); exc-7(csb29)
fust-1(csb21); mbl-1(csb31)
fust-1(csb21); asd-1(csb32)
fust-1(csb21); tiar-3(csb35)
fust-1(csb21); Y57G11C.9(csb36)
fust-1(csb21); tdp-1(csb38)
mec-8(csb23); msi-1(csb30)
mec-8(csb23); fox-1(csb39)
mec-8(csb23); hrpf-1(csb26)
mec-8(csb23/+); exc-7(csb29)	mec-8(csb22); exc-7(csb28/+)	mec-8(e398/+); exc-7(rh252)
mec-8(csb22); mbl-1(csb31)
mec-8(csb23); asd-1(csb32)
mec-8(csb22); tiar-3(csb35)
mec-8(csb23); Y57G11C.9(csb36)
mec-8(csb22); tdp-1(csb38)
msi-1(csb25); fox-1(csb39)
msi-1(csb24); hrpf-1(csb27)
msi-1(csb24); exc-7(csb29)
msi-1(csb24); mbl-1(csb31)
msi-1(csb25); asd-1(csb32)
msi-1(csb24); tiar-3(csb35)
msi-1(csb25); Y57G11C.9(csb36)
msi-1(csb24); tdp-1(csb38)
fox-1(csb39); hrpf-1(csb27)
fox-1(csb39); exc-7(csb29)
fox-1(csb39); mbl-1(csb31)
fox-1(csb39); asd-1(csb32)
fox-1(csb39); tiar-3(csb35)
fox-1(csb39); Y57G11C.9(csb36)
fox-1(csb39); tdp-1(csb38)
hrpf-1(csb26); exc-7(csb29)
hrpf-1(csb26); mbl-1(csb31)	hrpf-1(csb27); mbl-1(csb30)
hrpf-1(csb27); asd-1(csb32)
hrpf-1(csb26); tiar-3(csb35)
hrpf-1(csb27); Y57G11C.9(csb36)
hrpf-1(csb26); tdp-1(csb38)
exc-7(csb28); mbl-1(csb31)	exc-7(csb29); mbl-1(csb30)	exc-7(rh252); mbl-1(wy560)
exc-7(csb29); asd-1(csb32)
exc-7(csb28); tiar-3(csb35)
exc-7(csb29); Y57G11C.9(csb36)
exc-7(csb29); tdp-1(csb37)
mbl-1(csb31); asd-1(csb32)
mbl-1(csb30); tiar-3(csb35)
mbl-1(csb31); Y57G11C.9(csb36)
mbl-1(csb30); tdp-1(csb38)
asd-1(csb32); tiar-3(csb35)
asd-1(csb32); Y57G11C.9(csb36)
asd-1(csb32); tdp-1(csb38)
tiar-3(csb35); Y57G11C.9(csb36)
tiar-3(csb35); tdp-1(csb38)
Y57G11C.9(csb36); tdp-1(csb38)
c25a1.4(csb40); unc-75(csb20)
c25a1.4(csb40); fust-1(csb21)
c25a1.4(csb40); mec-8(csb23)
c25a1.4(csb40); msi-1(csb25)
c25a1.4(csb40); fox-1(csb39)
c25a1.4(csb40); hrpf-1(csb27)
c25a1.4(csb40); exc-7(csb29)
c25a1.4(csb40); mbl-1(csb31)
c25a1.4(csb40); asd-1(csb32)
c25a1.4(csb40); tiar-3(csb35)
c25a1.4(csb40); Y57G11C.9(csb36)
c25a1.4(csb40); tdp-1(csb38)
