# Supplementary figures and images for: CRISPR-mediated genetic interaction profiling identifies RNA binding proteins controlling metazoan fitness
Source: eLife journal article supplement (doi:10.7554/elife.28129), 2017-07-18

Figure 5 – figure supplement 1

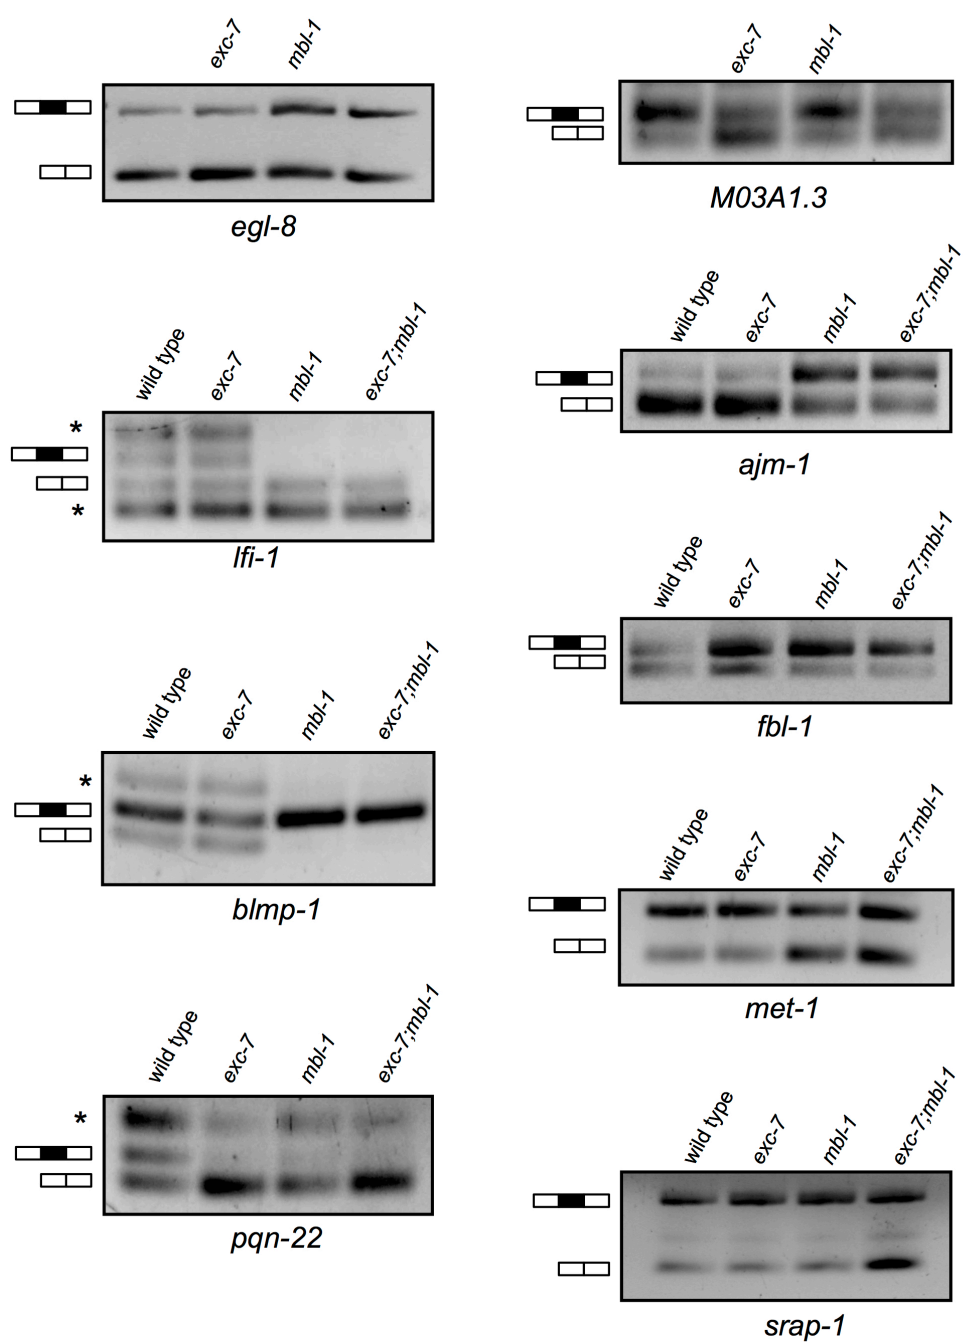

Supplement: supp [file elife-28129-supp-v1.zip]

Figure 2 – figure supplement 1

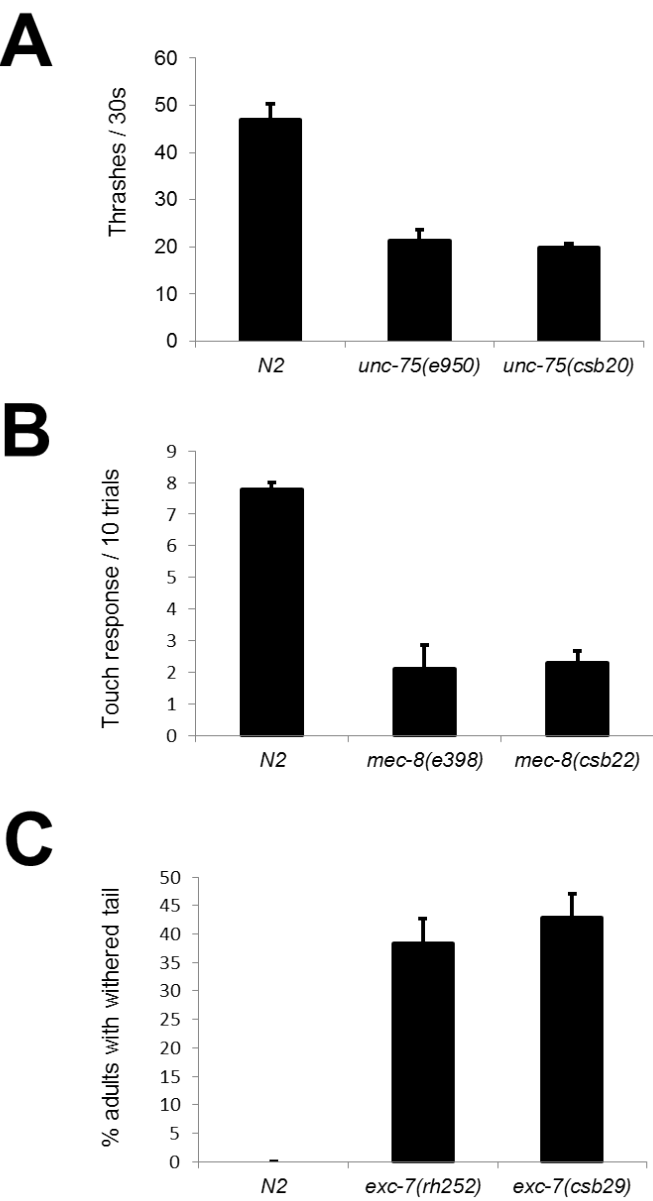

Supplement: supp [file elife-28129-supp-v1.zip › elife_poa_e28129_Figure_2_figure_supplement_1.pdf]

Figure 6 – figure supplement 1

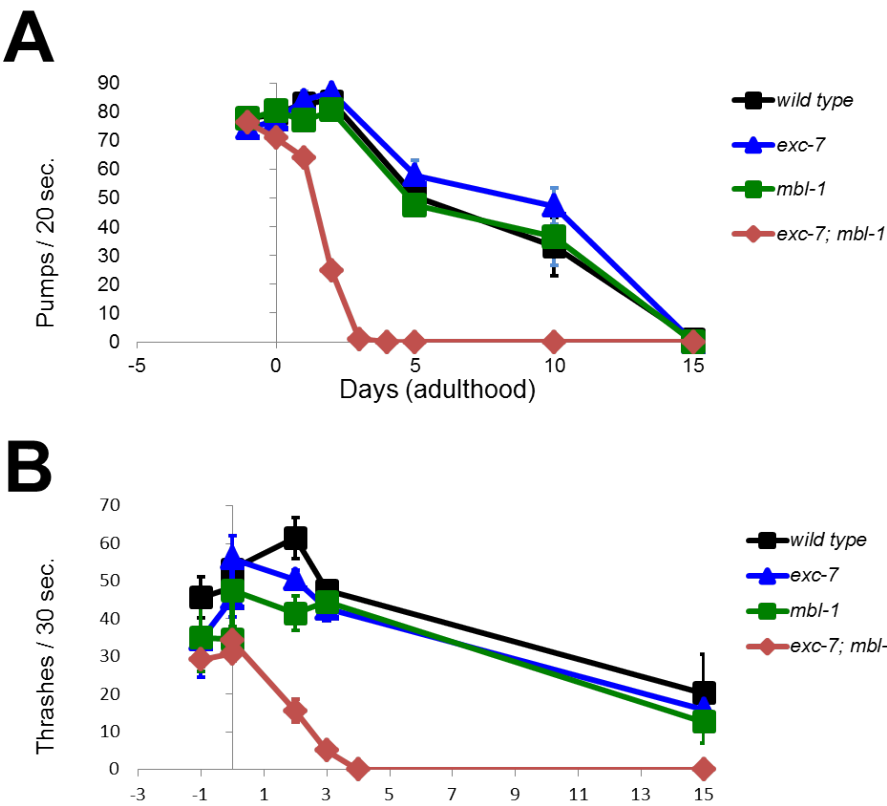

Supplement: supp [file elife-28129-supp-v1.zip › elife_poa_e28129_Figure_6_figure_supplement_1.pdf]
